# Supplementary material for: Heterologous biosynthesis of cotylenol and concise synthesis of fusicoccane diterpenoids
Source: publisher site journal article supplement (doi:10.3762/bjoc.21.111), 2025-07-21

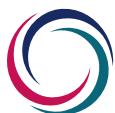

## Supporting Information

for

### Heterologous biosynthesis of cotylenol and concise synthesis of fusicoccane diterpenoids

Ye Yuan, Zhenhua Guan, Xue-Jie Zhang, Nanyu Yao, Wenling Yuan, Yonghui Zhang, Ying Ye and Zheng Xiang

*Beilstein J. Org. Chem.* **2025**, 21, 1489–1495. doi:10.3762/bjoc.21.111

### Experimental data and copies of spectra

## Table of contents

|                                      |     |
|--------------------------------------|-----|
| <b>I. General information</b>        | S2  |
| <b>II. Heterologous biosynthesis</b> | S3  |
| <b>III. Chemical synthesis</b>       | S9  |
| <b>IV. References</b>                | S21 |
| <b>V. NMR spectra</b>                | S22 |

## I. General information

HPLC–MS analyses were recorded on Agilent 1290 Infinity II-6545B Q-TOF. Oligonucleotides for PCRs were purchased from Sangon Biotech (Shanghai, China). Reagents were purchased from Bidepharm, Sigma Aldrich, Macklin, Merck and Aladdin and used without further purification. Anhydrous tetrahydrofuran and dichloromethane were purchased from Energy Chemical and used directly.

For reactions that require heating, an oil bath was used in all procedures. Reactions were monitored by thin-layer chromatography (TLC) carried out on 0.25 mm Tsingdao silica gel plates (GF-254) and visualized under UV light at 254 nm. Staining was performed with an ethanolic solution of phosphomolybdic acid (PMA) and subsequent heating. Tsingdao silica gel (200–300 mesh) was used for column chromatography. Yields refer to chromatographically and spectroscopically ( $^1\text{H}$  NMR) homogeneous materials.

NMR spectra were recorded on either a Bruker 400 MHz ( $^1\text{H}$ : 400 MHz,  $^{13}\text{C}$ : 100 MHz), Bruker 500 MHz ( $^1\text{H}$ : 500 MHz,  $^{13}\text{C}$ : 125 MHz) or Bruker 600 MHz ( $^1\text{H}$ : 600 MHz,  $^{13}\text{C}$ : 150 MHz). Chemical shifts are referenced to residual solvent ( $\text{CDCl}_3$ :  $^1\text{H}$  NMR = 7.26 ppm,  $^{13}\text{C}$  NMR = 77.16 ppm). The following abbreviations were used to explain the multiplicities: s = singlet, d = doublet, t = triplet, q = quartet, m = multiplet, br = broad. High-resolution mass spectra (HRMS) were measured on an ABI Q-star Elite with the ionization method ESI and the mass analyzer type of TOF. Optical rotation values were recorded on a Rudolph Research Analytical Autopol I polarimeter (Rudolph Research Co.).

Abbreviations: DCM: dichloromethane; EtOAc: ethyl acetate; PE: petroleum ether; DMSO: dimethyl sulfoxide; THF: tetrahydrofuran; equiv.: equivalent; TBAF: tetrabutylammonium fluoride trihydrate; PCC: pyridinium chlorochromate; M.P.: melting point; NMR: nuclear magnetic resonance.

## II. Heterologous biosynthesis of brassicicene I (5) and cotylenol (3)

### Strains

*Escherichia coli* DH5 $\alpha$  was used for cloning and following standard recombinant DNA techniques. *Aspergillus oryzae* NSAR1, a quadruple auxotrophic mutant (*niaD*<sup>-</sup>, *sC*<sup>-</sup>, *adeA*<sup>-</sup>, and *argB*<sup>-</sup>) was used as the host for gene expression. *Alternaria brassicicola* XXC was grown on potato dextrose agar at 30 °C for 4 days for gDNA extraction.

### Genomic DNA preparation

Mycelia of *Alternaria brassicicola* XXC was grown in potato dextrose agar (PDA) at 30 °C for 4 days before it was collected and lyophilized with liquid nitrogen. The mycelia were grinded via TissueLyser (Shanghai Jinxing Co., Ltd, China). Genomic DNA was extracted by fugal genomic DNA extraction kit (BioFlux) according to the instruction of the manufacturer.

### Construction of *A. oryzae* expression plasmids

The primers used in this study are listed in Table S1. The *abnA*, *abnB*, *abnC*, *abnD*, *abnE* were amplified from the genomic DNA of *Alternaria brassicicola* XXC. The *orf7* gene was synthesized by GenScript (Nanjing, China). The linker region of the following plasmids was amplified from pAdeA2. Five expression plasmids were constructed as follows. The NheI digested fragments of pAdeA2 plasmid were subjected to Gibson assembly (NEBuilder HiFi DNA Assembly Master Mix, New England BioLabs) with *orf7* to construct pAdeA2-*orf7*. The KpnI and NheI digested fragments of pAdeA2 and pUARA2 plasmid were subjected to Gibson assembly (NEBuilder HiFi DNA Assembly Master Mix, New England BioLabs) with *abnA*, *abnB*, *abnC*, *abnD* and the corresponding linker to construct pAdeA2-*abnAB* and pUARA2-*abnCD*, respectively. The pUSA2-*abnE* and pUSA2-*abnE-orf7* were also constructed by Gibson assembly.

### Transformation of *A. oryzae*

Transformation of *A. oryzae* was performed by the protoplast-polyethylene glycol method that has been reported.<sup>[1]</sup> Plasmids used for the construction of each transformant are summarized in Table S2.

### **Extraction of the metabolites from the biotransformation *AO-abnABCDE* and *AO-abnABCDE-orf7***

Spore suspension of each transformant was inoculated into MPY medium (3% maltose, 1% hipolypeptone, 0.5% yeast extract, 0.925% (NH<sub>4</sub>)<sub>2</sub>SO<sub>4</sub>, 100 mL) in 500 mL Erlenmeyer flasks. Each culture was incubated at 30 °C for 3 days. If appropriate, the mycelia and culture broth was separated prior to extraction. After the extraction with EtOAc, the extract was concentrated in vacuo to afford crude extracts. The crude extracts were analyzed by LC–MS with an Eclipse Plus C18 column (2.1 × 100 mm, 3.5 µm) under the following conditions. CH<sub>3</sub>CN and H<sub>2</sub>O (each contained 0.1% HCOOH) were used as eluents. The concentration of CH<sub>3</sub>CN was linearly increased from 5% to 98% over 11 min and kept at 100% for 2 min. Flow rate was kept at 0.5 mL min<sup>-1</sup>. Metabolites were analyzed in ESI positive mode.

### **Production of brassicicene I (5) from *AO-abnABCDE***

Spore suspension of transformant *AO-abnABCDE* was inoculated into MPY medium (3% maltose, 1% hipolypeptone, 0.5% yeast extract, 0.925% (NH<sub>4</sub>)<sub>2</sub>SO<sub>4</sub>, 200 mL) in 1000 mL Erlenmeyer flasks. To each culture was added 3 g Amberlite XAD-16 packaged in tea bags. After incubating for 3 to 5 days at 30 °C, the Amberlite XAD-16 and liquid part were separated by filtration. The liquid part was extracted three times using EtOAc, and the Amberlite XAD-16 was soaked with MeOH for three times. The combined organic phase was concentrated in vacuo to afford crude extracts, which were further purified by column chromatography (silica gel, 200–300 mesh, PE/EtOAc 100:1 to 8:1) to afford brassicicene I (30 mg/L).

### ***Orf7* transformant feeding studies**

To test the gene function of *orf7* *in vivo*, the *AO-NSARI* and transformant *AO-orf7* were cultured on oat agar medium plates at 30 °C for 3 days, respectively, which then were grown in 4 mL MPY medium (3% maltose, 1% hipolypeptone, 0.5% yeast extract, 0.925% (NH<sub>4</sub>)<sub>2</sub>SO<sub>4</sub>, 0.15% methionine, 0.06% arginine) with 100 µg brassicicene I (5). After incubating for 4 days at 30 °C, the mycelium and liquid part were separated by filtration. Then the liquid part was extracted three times using EtOAc. The solvent was removed under vacuo to obtain crude extracts, which were analyzed by LC–MS equipped with an Eclipse Plus C18 column (2.1 × 100 mm, 3.5 µm) under the

following conditions. CH<sub>3</sub>CN and H<sub>2</sub>O (each contained 0.1% HCOOH) were used as eluents. The concentration of CH<sub>3</sub>CN was linearly increased from 5% to 98% over 11 min and kept at 100% for 2 min. The flow rate was kept at 0.5 mL min<sup>-1</sup>. Metabolites were analyzed in ESI positive mode.

### Production of cotylenol (3) from *AO-abnABCDE-orf7*

To produce cotylenol from *AO-abnABCDE-orf7*, the transformant *AO-abnABCDE-orf7* was cultured on oat agar medium plates at 30 °C for 3 days, which then was cultured with rice medium (1 kg) at 30 °C for 10 days and soaked with solvent EtOAc for three times. The solvent was removed in vacuo to obtain crude extracts, which were purified by column chromatography (silica gel, 200–300 mesh, PE/EtOAc 100:1 to 5:1) to afford cotylenol (3) (60 mg).

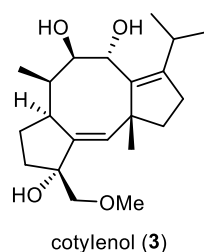

Data for cotylenol (3):

white solid;

$[\alpha]_D^{25.0} = -88$  (*c* 0.11, CH<sub>3</sub>OH).

**<sup>1</sup>H NMR** (400 MHz, CDCl<sub>3</sub>)  $\delta$  5.51 (d, *J* = 2.6 Hz, 1H), 4.06 (d, *J* = 10.0 Hz, 1H), 3.93 (dd, *J* = 10.0, 4.4 Hz, 1H), 3.40 (s, 3H), 3.35 (d, *J* = 9.5 Hz, 1H), 3.26 (p, *J* = 6.8 Hz, 1H), 3.08 (dd, *J* = 9.5, 1.3 Hz, 1H), 2.93 (td, *J* = 8.6, 2.6 Hz, 1H), 2.17 – 2.06 (m, 3H), 2.03 – 1.92 (m, 3H), 1.84 (ddd, *J* = 12.0, 6.9, 2.2 Hz, 1H), 1.68 (ddd, *J* = 12.0, 10.0, 8.4 Hz, 1H), 1.41 (dddd, *J* = 13.3, 11.9, 7.7, 1.3 Hz, 1H), 1.33 – 1.27 (m, 1H), 1.21 (s, 3H), 1.03 (d, *J* = 6.7 Hz, 3H), 0.95 (d, *J* = 6.9 Hz, 3H), 0.80 (d, *J* = 7.2 Hz, 3H);

**<sup>13</sup>C NMR** (150 MHz, CDCl<sub>3</sub>)  $\delta$  150.4, 139.7, 136.9, 134.4, 82.1, 77.6, 77.4, 67.9, 59.4, 51.9, 42.6, 41.7, 40.3, 35.4, 31.7, 28.2, 27.2, 26.6, 21.6, 20.4, 8.5;

**HRMS (ESI):** *m/z* calcd for C<sub>21</sub>H<sub>34</sub>NaO<sub>4</sub><sup>+</sup>: 373.2349 [M+Na]<sup>+</sup>; found: 373.2352.

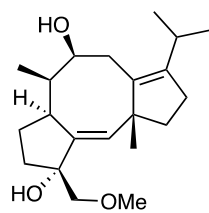

brassicicene I (**5**)

Data for brassicicene I (**5**):

colorless oil;

$[\alpha]_{\text{D}}^{25.0} = +27$  (c 0.11, CH<sub>3</sub>OH).

**<sup>1</sup>H NMR** (600 MHz, CDCl<sub>3</sub>)  $\delta$  5.59 (d,  $J$  = 2.5 Hz, 1H), 3.89 (dt,  $J$  = 11.5, 3.9 Hz, 1H), 3.41 (s, 3H), 3.38 (d,  $J$  = 9.5 Hz, 1H), 3.15 (d,  $J$  = 1.2 Hz, 1H), 2.89 (td,  $J$  = 8.0, 2.4 Hz, 1H), 2.78 (p,  $J$  = 6.8 Hz, 1H), 2.31 (dtd,  $J$  = 13.4, 2.5, 1.2 Hz, 1H), 2.22 – 1.92 (m, 5H), 1.80 (ddd,  $J$  = 12.0, 7.5, 3.3 Hz, 2H), 1.70 – 1.62 (m, 1H), 1.46 – 1.38 (m, 1H), 1.33 – 1.19 (m, 1H), 1.13 (s, 3H), 0.98 (dd,  $J$  = 12.5, 6.8 Hz, 6H), 0.80 (d,  $J$  = 7.1 Hz, 3H);

**<sup>13</sup>C NMR** (150 MHz, CDCl<sub>3</sub>)  $\delta$  146.0, 139.5, 135.6, 132.6, 82.1, 77.7, 76.4, 59.5, 52.9, 44.7, 42.1, 40.5, 35.7, 32.1, 28.6, 27.5, 27.2, 26.6, 21.0, 20.9, 8.1;

<sup>1</sup>H and <sup>13</sup>C NMR data are in good agreement with reported ones.<sup>[2]</sup>

**HRMS (ESI):**  $m/z$  calcd for C<sub>21</sub>H<sub>34</sub>NaO<sub>3</sub><sup>+</sup>: 357.2400 [M+Na]<sup>+</sup>; found: 357.2397.

**Table S1:** Oligonucleotides used for construction of plasmids

| amplicon    | Sequence (from 5' to 3')                                  | size    |
|-------------|-----------------------------------------------------------|---------|
|             |                                                           | vector  |
| <i>abnA</i> | TTCGAATCGATTTGAGCTAGCATGAAATACCAATTTTCCATCA               | 2524 bp |
|             | CACTAGTGCGGCCGCTAGCTCAAAGCTTGAGCATCATTAG                  | pAdeA2  |
| <i>abnB</i> | CGGAATTCGAGCTCGGTACCATGGCTACAACCTTTACACA                  | 1972 bp |
|             | ACTACAGATCCCCGGGTACCCTACTCCTTGTTTTTTCTAACGA               | pAdeA2  |
| linker      | GGTACCCGGGGATCTGTAGT                                      | 858 bp  |
|             | GCTAGCTCAAATCGATTCTGA                                     |         |
| <i>abnC</i> | TCTGAATCGATTTGAGCTAGCATGGCTTCCATACTATGGAC                 | 1760 bp |
|             | GTCAGTAGTGCGGCCGCTAGCTATTTTCGTTCTCGGAGCGA                 | pUARA2  |
| <i>abnD</i> | CGGAATTCGAGCTCGGTACCATGGCAGTCCAAGAGACAGA                  | 1353 bp |
|             | ACTACAGATCCCCGGGTACCTTATGCATTCTGTGCCGCAG                  | pUARA2  |
| <i>abnE</i> | CGGAATTCGAGCTCGGTACCATGGCTTCCACCAGTTCCAC                  | 1471 bp |
|             | ACTACAGATCCCCGGGTACCTTAATGAGCCACCGCTGTTG                  | pUSA2   |
| <i>orf7</i> | AAGCTCCGAATTCGAATCGATTTGAGCTAGCATGCTCTCCACC<br>ATGGAC     | 1536 bp |
|             | ACTACCCGGGTCACTAGTGCGGCCGCTAGCTCAACCTGGTAA<br>CTTAACTTCCT | pUSA2   |



**Table S2:** Summary of the transformants in this study

| Transformants           | plasmids             |                      |                         |
|-------------------------|----------------------|----------------------|-------------------------|
|                         | <i>AdeA</i>          | <i>ArgB</i>          | <i>sC</i>               |
| <i>AO-orf7</i>          | pAdeA2- <i>orf7</i>  |                      |                         |
| <i>AO-abnABCDE</i>      | pAdeA2- <i>abnAB</i> | pUARA2- <i>abnCD</i> | pUSA2- <i>abnE</i>      |
| <i>AO-abnABCDE-orf7</i> | pAdeA2- <i>abnAB</i> | pUARA2- <i>abnCD</i> | pUSA2- <i>abnE-orf7</i> |

### III. Chemical synthesis and analysis

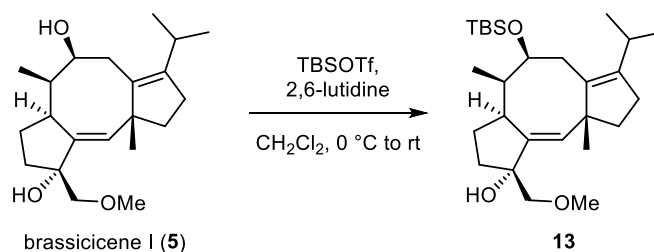

To a stirred solution of brassicene I (**5**, 237 mg, 0.71 mmol) and 2,6-lutidine (413  $\mu\text{L}$ , 3.55 mmol) in  $\text{CH}_2\text{Cl}_2$  (4 mL) was added *tert*-butyldimethylsilyl trifluoromethanesulfonate (TBSOTf, 490  $\mu\text{L}$ , 2.13 mmol) at 0  $^\circ\text{C}$ . The reaction mixture was stirred for 2 hours until full consumption of brassicene I. The resulting mixture was quenched with saturated  $\text{NH}_4\text{Cl}$  solution (30 mL) and extracted with  $\text{CH}_2\text{Cl}_2$  (50 mL  $\times$  3). The organic layers were combined and dried over  $\text{Na}_2\text{SO}_4$  and filtered. The filtrate was concentrated under reduced pressure, and the residue was purified by column chromatography on silica gel (PE/EtOAc 30:1) to provide the desired product **13** (296 mg, 93%) as a light yellow oil.

Data for **13**:

$R_f = 0.8$  (PE : EtOAc = 3 : 1);

$[\alpha]_D^{20.0} = -12.00$  ( $c$  2.00,  $\text{CHCl}_3$ ).

**$^1\text{H}$  NMR** (400 MHz,  $\text{CDCl}_3$ )  $\delta$  5.57 (d,  $J = 2.4$  Hz, 1H), 3.81 (dt,  $J = 11.2, 4.1$  Hz, 1H), 3.41 (s, 3H), 3.39 (d,  $J = 9.7$  Hz, 1H), 3.15 (d,  $J = 9.5$  Hz, 1H), 2.86 (td,  $J = 7.9, 2.4$  Hz, 1H), 2.76 (hept,  $J = 6.9$  Hz, 1H), 2.41 (s, 1H), 2.25 – 2.13 (m, 1H), 2.12 – 2.01 (m, 3H), 2.00 – 1.89 (m, 2H), 1.77 (ddd,  $J = 11.4, 7.2, 3.6$  Hz, 1H), 1.73 – 1.56 (m, 2H), 1.43 (dt,  $J = 13.9, 7.8$  Hz, 1H), 1.32 – 1.19 (m, 1H), 1.10 (s, 3H), 0.99 (dd,  $J = 14.5, 6.8$  Hz, 6H), 0.89 (s, 9H), 0.77 (d,  $J = 7.1$  Hz, 3H), 0.09 (s, 3H), 0.06 (s, 3H) ppm.

**$^{13}\text{C}$  NMR** (100 MHz,  $\text{CDCl}_3$ )  $\delta$  145.3, 139.8, 135.4, 133.7, 82.1, 77.8, 76.6, 59.5, 52.9, 45.6, 42.0, 40.5, 35.8, 32.5, 29.3, 27.7, 27.2, 26.6, 26.0, 20.9, 20.9, 18.2, 8.3,  $-4.4$ ,  $-4.7$  ppm.

**HRMS (ESI)**:  $m/z$  calcd for  $\text{C}_{27}\text{H}_{48}\text{NaO}_3\text{Si}^+$ : 471.3265  $[\text{M}+\text{Na}]^+$ ; found: 471.3268.



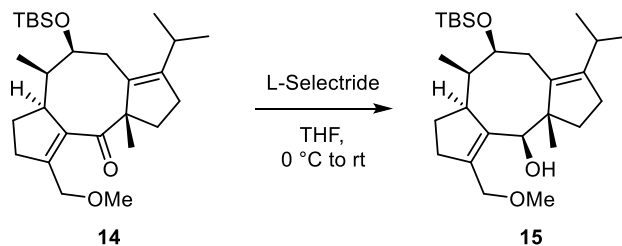

Enone **14** (41 mg, 0.09 mmol) in THF (3 mL) was cooled to 0 °C under argon. L-Selectride (1 M in THF, 0.27 mL, 0.27 mmol) was added dropwise. After the addition, the reaction mixture was allowed to warm to room temperature. After stirring for 1 hour, a hydrolytic work-up was carried out by using a saturated aqueous solution of  $\text{NH}_4\text{Cl}$ . The organic phase was extracted with ethyl acetate. The combined organic extracts were dried over  $\text{Na}_2\text{SO}_4$ , filtered and the solvent was removed under reduced pressure. The crude product showed a 9:1 d.r. as determined by  $^1\text{H}$  NMR spectroscopy. The yield of diastereoisomers is 90% after flash column chromatography (PE/EtOAc 8:1). The crude product was purified by silica gel chromatography (PE/EtOAc 25:1) to give the desired product **15** (31 mg, 75%) as a colorless oil.

Data for **15**:

$R_f = 0.55$  (PE : EtOAc = 5 : 1);

$[\alpha]_D^{20.0} = -22.21$  ( $c$  3.60,  $\text{CHCl}_3$ ).

$^1\text{H}$  NMR (400 MHz,  $\text{CDCl}_3$ )  $\delta$  4.40 (dd,  $J = 11.5, 2.1$  Hz, 1H), 4.05 (d,  $J = 3.6$  Hz, 1H), 3.95 (d,  $J = 1.7$  Hz, 1H), 3.72 (ddd,  $J = 11.4, 5.8, 3.0$  Hz, 1H), 3.36 (s, 3H), 3.24 (d,  $J = 4.0$  Hz, 1H), 2.70 (s, 1H), 2.56 (p,  $J = 6.8$  Hz, 1H), 2.33 – 2.19 (m, 6H), 2.10 (dd,  $J = 13.2, 11.5$  Hz, 1H), 1.97 – 1.81 (m, 4H), 1.08 – 0.55 (m, 12H), 0.89 (s, 9H), 0.06 (s, 3H), 0.04 (s, 3H) ppm.

$^{13}\text{C}$  NMR (100 MHz,  $\text{CDCl}_3$ )  $\delta$  144.8, 144.7, 135.1, 134.2, 78.5, 71.2, 58.7, 57.0, 55.7, 36.5, 35.2, 33.9, 32.2, 29.8, 27.9, 27.1, 26.1, 24.8, 21.8, 20.9, 19.4, 19.0, 18.1, –3.9, –4.9 ppm.

HRMS (ESI):  $m/z$  calcd for  $\text{C}_{27}\text{H}_{48}\text{NaO}_3\text{Si}^+$ : 471.3265  $[\text{M}+\text{Na}]^+$ ; found: 471.3269.

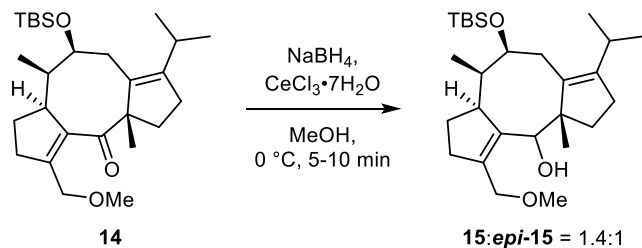

The starting enone **14** (41 mg, 0.09 mmol) was dissolved in 1 mL methanol at 0 °C. Then,  $\text{CeCl}_3 \cdot 7\text{H}_2\text{O}$  (22.4 mg, 0.06 mM) and  $\text{NaBH}_4$  (7.0 mg, 0.18 mmol) was slowly added with stirring. The mixture was allowed to react for 5–10 min until full consumption of enone **14**, then treated with water and extracted with EtOAc. The organic layers were combined and dried over  $\text{Na}_2\text{SO}_4$  and filtered. The filtrate was concentrated under reduced pressure, and the residue was purified by column chromatography on silica gel (PE/EtOAc 20:1) to give the corresponding alcohol (37 mg, 91%) in 1.4:1 d.r.

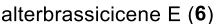

Data for alterbrassicicene E (**6**):

$$[\alpha]_{\text{D}}^{20.0} = +6.66 (c\ 0.60, \text{CHCl}_3).$$

**<sup>13</sup>C NMR** (100 MHz, CD<sub>3</sub>OD) δ 146.0, 144.7, 137.4, 135.5, 79.1, 77.1, 71.8, 58.4, 57.2, 56.4, 37.7, 34.8, 34.2, 32.3, 28.6, 27.7, 25.8, 22.0, 21.1, 19.2, 18.9 ppm.

The spectra data was consistent with the literature.<sup>[3]</sup>

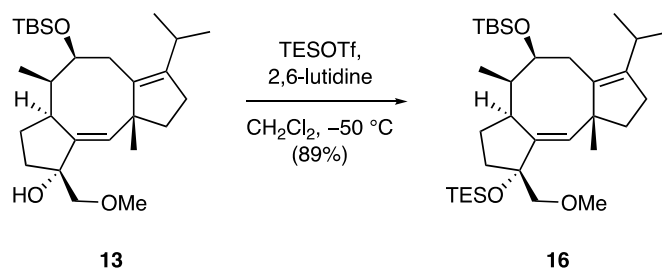

To a stirred solution of **13** (135 mg, 0.3 mmol) and 2,6-lutidine (105  $\mu\text{L}$ , 0.9 mmol) in  $\text{CH}_2\text{Cl}_2$  (4 mL) at  $-50\text{ }^\circ\text{C}$  was added triethylsilyl trifluoromethanesulfonate (TESOTf; 132  $\mu\text{L}$ , 0.6 mmol). The reaction mixture was stirred at  $-50\text{ }^\circ\text{C}$  for 2 h. The reaction was quenched with saturated  $\text{NH}_4\text{Cl}$  (40 mL) solution and extracted with  $\text{CH}_2\text{Cl}_2$  (50 mL  $\times$  3). The organic layers were combined and dried over  $\text{Na}_2\text{SO}_4$  and filtered. The filtrate was concentrated under reduced pressure, and the residue was purified by column chromatography on silica gel (PE/EtOAc 100:1) to give protected alcohol **16** (150 mg, 89%) as colorless oil.

Data for **16**:

$R_f = 0.8$  (PE : EtOAc = 25 : 1);

$[\alpha]_D^{20.0} = -16.24$  ( $c$  3.20,  $\text{CHCl}_3$ ).

$^1\text{H NMR}$  (400 MHz,  $\text{CDCl}_3$ )  $\delta$  5.46 (d,  $J = 2.6$  Hz, 1H), 3.79 (dt,  $J = 11.2, 4.1$  Hz, 1H), 3.35 (s, 3H), 3.31 (d,  $J = 10.4$  Hz, 1H), 2.91 (dd,  $J = 10.4, 1.5$  Hz, 1H), 2.82 – 2.63 (m, 2H), 2.37 – 1.92 (m, 5H), 1.93 – 1.75 (m, 2H), 1.65 – 1.53 (m, 2H), 1.46 – 1.30 (m, 1H), 1.23 – 1.12 (m, 1H), 1.12 (s, 3H), 1.02 – 0.90 (m, 15H), 0.90 (s, 9H), 0.77 (d,  $J = 7.1$  Hz, 3H), 0.57 (h,  $J = 7.6$  Hz, 6H), 0.09 (s, 3H), 0.06 (s, 3H) ppm.

$^{13}\text{C NMR}$  (100 MHz,  $\text{CDCl}_3$ )  $\delta$  145.5, 139.8, 134.6, 133.2, 85.0, 77.7, 76.8, 59.4, 52.7, 45.0, 42.7, 40.2, 34.1, 31.8, 29.3, 27.7, 27.3, 26.4, 26.0, 21.0, 21.0, 18.2, 7.7, 7.4, 6.8,  $-4.4, -4.7$  ppm.

**HRMS (ESI)**:  $m/z$  calcd for  $\text{C}_{33}\text{H}_{62}\text{NaO}_3\text{Si}_2^+$ : 585.4130  $[\text{M}+\text{Na}]^+$ ; found: 585.4132.

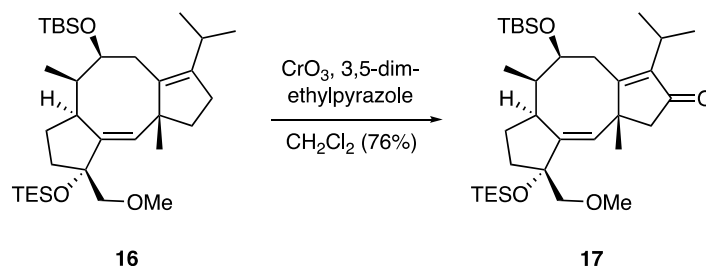

3,5-Dimethylpyrazole (327 mg, 3.4 mmol) was added to a suspension of  $\text{CrO}_3$  (340 mg, 3.4 mmol) in  $\text{CH}_2\text{Cl}_2$  (15 mL) at 0 °C. After being stirred at 0 °C for 15 min, this mixture was added to a solution of **16** (160 mg, 0.28 mmol) in  $\text{CH}_2\text{Cl}_2$  (15 mL) at room temperature. The reaction mixture was stirred at room temperature for 4 to 6 hours. Prolonging the reaction time will increase by-products. After the complete consumption of starting material **16**, silica gel (4 g) was added. The resultant suspension was concentrated, charged on silica gel and purified (PE/EtOAc 80:1) to afford **17** (123 mg, 76%) as a light yellow oil.

Data for **17**:

$R_f = 0.4$  (PE : EtOAc = 20 : 1);

$[\alpha]_D^{20.0} = -3.08$  ( $c$  0.80,  $\text{CHCl}_3$ ).

**$^1\text{H NMR}$**  (400 MHz,  $\text{CDCl}_3$ )  $\delta$  5.64 (d,  $J = 2.5$  Hz, 1H), 3.88 (dt,  $J = 11.2, 3.6$  Hz, 1H), 3.35 (d,  $J = 10.0$  Hz, 1H), 3.33 (s, 3H), 3.00 (dd,  $J = 10.1, 1.2$  Hz, 1H), 2.74 (p,  $J = 7.0$  Hz, 1H), 2.63 – 2.50 (m, 2H), 2.42 (dd,  $J = 12.9, 3.1$  Hz, 1H), 2.36 (d,  $J = 18.2$  Hz, 1H), 2.24 (dd,  $J = 18.2, 0.9$  Hz, 1H), 2.02 (ddd,  $J = 11.9, 6.3, 3.2$  Hz, 1H), 1.88 (dddd,  $J = 12.7, 9.1, 7.1, 3.2$  Hz, 1H), 1.75 – 1.69 (m, 1H), 1.39 – 1.22 (m, 6H), 1.19 (d,  $J = 6.9$  Hz, 3H), 1.00 – 0.77 (m, 21H), 0.54 (qd,  $J = 7.9, 5.3$  Hz, 6H), 0.11 (s, 3H), 0.07 (s, 3H) ppm.

**$^{13}\text{C NMR}$**  (100 MHz,  $\text{CDCl}_3$ )  $\delta$  207.0, 172.6, 146.0, 140.4, 133.2, 84.7, 77.2, 76.3, 59.1, 53.1, 47.2, 45.3, 39.9, 34.6, 31.5, 31.4, 27.6, 26.6, 25.9, 19.9, 19.7, 18.1, 7.5, 7.4, 6.7, -4.5, -4.7 ppm.

**HRMS (ESI)**:  $m/z$  calcd for  $\text{C}_{33}\text{H}_{60}\text{NaO}_4\text{Si}_2^+$ : 599.3922  $[\text{M}+\text{Na}]^+$ ; found: 599.3924.



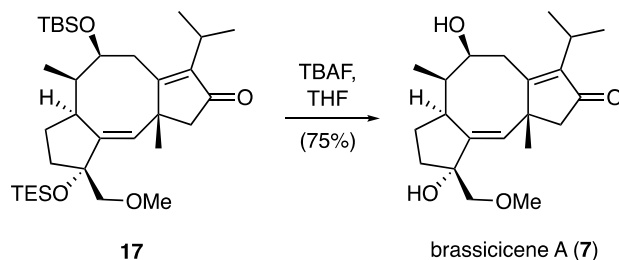

To a stirred solution of **17** (14.0 mg, 0.024 mmol) in THF (0.8 mL) in a Schlenk tube under argon was added tetrabutylammonium fluoride (TBAF, 1.0 mol/L in THF, 0.072 mmol, 72  $\mu$ L) at room temperature. The mixture was stirred at 50  $^{\circ}$ C for 1 hour until the fully conversion of **17**. The mixture was quenched with a saturated aqueous solution of  $\text{NH}_4\text{Cl}$  (5 mL) and extracted with EtOAc ( $3 \times 25$  mL). The combined organic layers were washed with brine, dried over anhydrous  $\text{Na}_2\text{SO}_4$ , filtered, and concentrated under reduced pressure. The residue was purified by column chromatography (PE/EtOAc 1:1) to provide brassicicene A (**7**) (6.3 mg, 75%) as a white solid.

Data for brassicicene A (7):

$$[\alpha]_{\text{D}}^{20.0} = +43.32 (c\ 3.60, \text{CHCl}_3).$$

**<sup>13</sup>C NMR** (100 MHz, CD<sub>3</sub>OD) δ 209.7, 175.9, 146.9, 142.1, 134.7, 83.3, 78.2, 76.4, 59.6, 53.4, 48.5, 46.1, 42.2, 36.5, 32.8, 31.4, 28.1, 27.3, 20.0, 19.9, 8.4 ppm.

The spectra data was consistent with the literature report.<sup>[4]</sup>

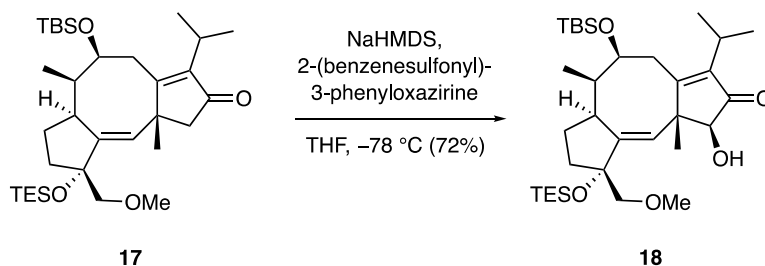

To a stirred solution of **17** (40.0 mg, 0.07 mmol) in THF (2 mL) under argon was added NaHMDS (1 M in THF, 0.35 mL, 0.35 mmol) at  $-78\text{ }^\circ\text{C}$ . The mixture was stirred at the same temperature for 0.5 h followed by the addition of 2-(benzenesulfonyl)-3-phenyloxaziridine (55 mg, 0.21 mmol). The mixture was stirred for 4 hours at  $-78\text{ }^\circ\text{C}$  before it was quenched with a saturated aqueous solution of  $\text{Na}_2\text{S}_2\text{O}_4$  (15 mL). The resulting mixture was extracted with EtOAc ( $3 \times 50\text{ mL}$ ). The combined organic layers were washed with brine (2.0 mL), dried over anhydrous  $\text{Na}_2\text{SO}_4$ , filtered, and concentrated under reduced pressure. The residue was purified by column chromatography (PE/EtOAc 30:1) to provide product **18** (30 mg, 72%) as a light yellow oil.

Data for **18**:

$R_f = 0.4$  (PE : EtOAc = 12.5 : 1);

$[\alpha]_D^{20.0} = +4.44$  ( $c$  1.80,  $\text{CHCl}_3$ ).

**$^1\text{H NMR}$**  (400 MHz,  $\text{CDCl}_3$ )  $\delta$  5.82 (d,  $J = 2.2\text{ Hz}$ , 1H), 3.87 – 3.79 (m, 2H), 3.43 (d,  $J = 10.0\text{ Hz}$ , 1H), 3.35 (s, 3H), 3.16 (d,  $J = 9.9\text{ Hz}$ , 1H), 2.76 (p,  $J = 7.0\text{ Hz}$ , 1H), 2.64 – 2.47 (m, 3H), 2.41 (dd,  $J = 12.7, 2.5\text{ Hz}$ , 1H), 2.11 – 1.82 (m, 2H), 1.79 – 1.69 (m, 1H), 1.51 – 1.32 (m, 2H), 1.26 (d,  $J = 7.0\text{ Hz}$ , 3H), 1.20 (d,  $J = 7.0\text{ Hz}$ , 3H), 1.13 (s, 3H), 0.99 – 0.84 (m, 21H), 0.56 (qd,  $J = 7.9, 5.2\text{ Hz}$ , 6H), 0.10 (s, 3H), 0.07 (s, 3H) ppm.

**$^{13}\text{C NMR}$**  (100 MHz,  $\text{CDCl}_3$ )  $\delta$  207.1, 173.3, 143.6, 141.8, 131.7, 84.8, 82.4, 77.6, 59.1, 51.9, 44.3, 40.3, 35.5, 32.3, 31.6, 26.2, 25.9, 23.7, 20.1, 19.5, 18.1, 7.3, 6.7,  $-4.6, -4.6$  ppm.

**HRMS (ESI)**:  $m/z$  calcd for  $\text{C}_{33}\text{H}_{60}\text{NaO}_5\text{Si}_2^+$ : 615.3871  $[\text{M}+\text{Na}]^+$ ; found: 615.3873.

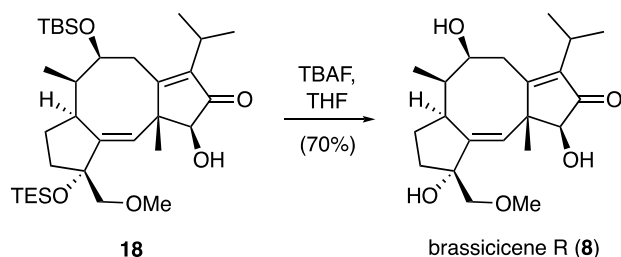

To a stirred solution of **18** (15.0 mg, 0.025 mmol) in THF (0.8 mL) in a Schlenk tube under argon was added tetrabutylammonium fluoride (TBAF, 1.0 mol/L in THF, 0.25 mmol, 250  $\mu$ L) at room temperature. The mixture was stirred at room temperature for 2 hours until full conversion of **18**. The mixture was quenched with a saturated aqueous solution of  $\text{NH}_4\text{Cl}$  (5 mL) and extracted with EtOAc ( $3 \times 20$  mL). The combined organic layers were washed with brine, dried over anhydrous  $\text{Na}_2\text{SO}_4$ , filtered, and concentrated under reduced pressure. The residue was purified by column chromatography (100% EtOAc) to provide brassicicene R (**8**) (6.4 mg, 70%) as a white solid.

Data for brassicicene R (**8**):

$R_f = 0.5$  (EtOAc);

$[\alpha]_D^{20.0} = +40.00$  ( $c$  0.60,  $\text{CHCl}_3$ ).

**$^1\text{H}$  NMR** (400 MHz,  $\text{CD}_3\text{OD}$ )  $\delta$  5.84 (d,  $J = 2.1$  Hz, 1H), 3.91 (s, 1H), 3.87 (dt,  $J = 9.1, 4.2$  Hz, 1H), 3.51 (d,  $J = 9.8$  Hz, 1H), 3.45 – 3.37 (m, 4H), 2.88 (p,  $J = 6.9$  Hz, 1H), 2.64 (dd,  $J = 7.7, 4.3$  Hz, 1H), 2.57 – 2.45 (m, 2H), 2.21 – 1.98 (m, 2H), 1.97 – 1.87 (m, 1H), 1.68 – 1.54 (m, 1H), 1.54 – 1.44 (m, 1H), 1.24 (d,  $J = 6.9$  Hz, 3H), 1.19 (d,  $J = 7.0$  Hz, 3H), 1.14 (s, 3H), 0.93 (d,  $J = 7.0$  Hz, 3H) ppm.

**$^{13}\text{C}$  NMR** (100 MHz,  $\text{CD}_3\text{OD}$ )  $\delta$  208.1, 173.8, 145.3, 143.5, 133.6, 83.8, 83.3, 78.7, 77.3, 59.7, 53.1, 45.5, 42.5, 37.3, 33.4, 31.9, 26.9, 24.2, 20.4, 19.5, 8.9 ppm.

**HRMS (ESI):**  $m/z$  calcd for  $\text{C}_{21}\text{H}_{32}\text{NaO}_5^+$ : 387.2142  $[\text{M}+\text{Na}]^+$ ; found: 387.2142.

The spectra data was consistent with the literature report.<sup>[4]</sup>

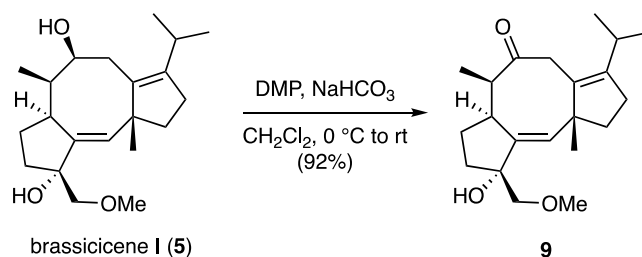

To a stirred solution of brassicicene I (**5**, 20 mg, 0.06 mmol) in 2.0 mL  $\text{CH}_2\text{Cl}_2$  at 0 °C was added  $\text{NaHCO}_3$  (30 mg, 0.36 mmol) and Dess–Martin periodinane (51 mg, 0.12 mmol). The solution was stirred at 0 °C for 15 minutes and at room temperature for 1 hour. After the complete conversion of brassicicene I (**5**), the reaction was quenched with 30 mL of a 1:1 mixture of 1 M  $\text{Na}_2\text{S}_2\text{O}_3$  and saturated  $\text{NaHCO}_3$  solution. The mixture was stirred until both layers were clear. The aqueous layer was extracted with  $\text{CH}_2\text{Cl}_2$  ( $3 \times 30$  mL). The organic layers were combined, dried with  $\text{Na}_2\text{SO}_4$ , filtered and the solvent was evaporated under reduced pressure. The crude product was purified by flash column chromatography (PE/EtOAc 10:1) to give the ketone **9** (18 mg, 92%) as a light yellow oil.

Data for **9**:

$R_f = 0.45$  (PE : EtOAc = 3 : 1);

$[\alpha]_D^{20.0} = +41.16$  ( $c$  3.40,  $\text{CHCl}_3$ ).

$^1\text{H NMR}$  (400 MHz,  $\text{CDCl}_3$ )  $\delta$  5.62 (d,  $J = 2.4$  Hz, 1H), 3.67 (dddd,  $J = 8.1, 6.2, 3.8, 2.3$  Hz, 1H), 3.39 (s, 3H), 3.33 (d,  $J = 14.6$  Hz, 1H), 3.29 (d,  $J = 9.5$  Hz, 1H), 3.21 (d,  $J = 9.5$  Hz, 1H), 2.97 (p,  $J = 6.9$  Hz, 1H), 2.90 (dt,  $J = 14.6, 2.4$  Hz, 1H), 2.76 (p,  $J = 6.8$  Hz, 1H), 2.42 (s, 1H), 2.22 (ddd,  $J = 9.7, 6.0, 2.6$  Hz, 2H), 2.02 – 1.87 (m, 2H), 1.85 – 1.70 (m, 2H), 1.62 – 1.47 (m, 2H), 1.12 (s, 3H), 1.07 – 0.86 (m, 9H) ppm.

$^{13}\text{C NMR}$  (100 MHz,  $\text{CDCl}_3$ )  $\delta$  212.3, 145.1, 143.2, 135.5, 132.7, 81.8, 78.7, 59.5, 53.3, 49.1, 41.1, 40.4, 40.3, 36.7, 27.8, 27.7, 27.5, 27.2, 21.2, 20.3, 12.2 ppm.

**HRMS (ESI):**  $m/z$  calcd for  $\text{C}_{21}\text{H}_{32}\text{NaO}_3^+$ : 355.2244  $[\text{M}+\text{Na}]^+$ ; found: 355.2246.

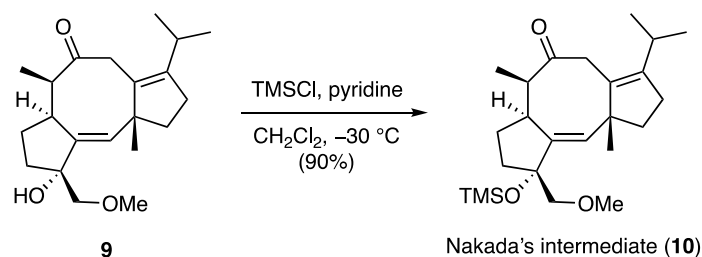

To a stirred solution of **9** (20 mg, 0.06 mmol) and pyridine (15  $\mu\text{L}$ , 0.18 mmol) in  $\text{CH}_2\text{Cl}_2$  (2 mL) at  $-30\text{ }^\circ\text{C}$  was added chlorotrimethylsilane (TMSCl, 15  $\mu\text{L}$ , 0.12 mmol). The reaction mixture was stirred at  $-30\text{ }^\circ\text{C}$  for 15 minutes. The reaction was quenched with saturated  $\text{NH}_4\text{Cl}$  (40 mL) solution and extracted with  $\text{CH}_2\text{Cl}_2$  (50 mL  $\times$  3). The organic layers were combined and dried over  $\text{Na}_2\text{SO}_4$  and filtered. The filtrate was concentrated under reduced pressure, and the residue was purified by column chromatography on silica gel (PE/EtOAc 20:1) to give Nakada's intermediate **10** (22 mg, 90%) as a yellow oil.

Data for **10**:

$R_f = 0.6$  (PE : EtOAc = 8 : 1);

$[\alpha]_{\text{D}}^{20.0} = -25.71$  ( $c$  1.40,  $\text{CHCl}_3$ ).

**$^1\text{H}$  NMR** (400 MHz,  $\text{CDCl}_3$ )  $\delta$  5.51 (d,  $J = 2.3$  Hz, 1H), 3.35 (s, 3H), 3.31 – 3.23 (m, 2H), 3.20 (d,  $J = 15.6$  Hz, 1H), 3.11 (d,  $J = 10.5$  Hz, 1H), 2.99 (dd,  $J = 10.5, 1.1$  Hz, 1H), 2.81 (dt,  $J = 15.7, 2.0$  Hz, 1H), 2.72 (p,  $J = 6.9$  Hz, 1H), 2.25 (t,  $J = 6.7$  Hz, 2H), 2.14 – 2.04 (m, 1H), 1.92 – 1.69 (m, 3H), 1.52 – 1.33 (m, 2H), 1.11 (s, 3H), 1.07 – 0.88 (m, 9H), 0.08 (s, 9H) ppm.

**$^{13}\text{C}$  NMR** (100 MHz,  $\text{CDCl}_3$ )  $\delta$  213.7, 145.1, 143.6, 134.1, 134.0, 85.2, 78.3, 59.4, 52.3, 45.3, 40.9, 40.6, 39.9, 34.3, 27.8, 27.5, 27.4, 26.6, 21.2, 20.3, 12.7, 2.5 ppm.

**HRMS (ESI)**:  $m/z$  calcd for  $\text{C}_{24}\text{H}_{40}\text{NaO}_3\text{Si}^+$ : 427.2639  $[\text{M}+\text{Na}]^+$ ; found: 427.2637.

The spectra data was consistent with the literature report.<sup>[5]</sup>

#### IV. References

1. Liu, C.; Tagami, K.; Minami, A.; Matsumoto, T.; Frisvad, J. C.; Suzuki, H.; Ishikawa, J.; Gomi, K.; Oikawa, H. Reconstitution of Biosynthetic Machinery for the Synthesis of the Highly Elaborated Indole Diterpene Penitrem. *Angew. Chem. Int. Ed.* **2015**, *54*, 5748–5752. DOI: 10.1002/anie.201501072.
2. Pedras, M. S.; Chumala, P. B.; Jin, W.; Islam, M. S.; Hauck, D. W. The phytopathogenic fungus *Alternaria brassicicola*: Phytotoxin production and phytoalexin elicitation. *Phytochemistry*. **2009**, *70*, 394–402. DOI: 10.1016/j.phytochem.2009.01.005
3. Li, F.; Lin, S.; Zhang, S.; Pan, L.; Chai, C.; Su, J.; Yang, B.; Liu, J.; Wang, J.; Hu, Z.; Zhang, Y. Modified Fusicoccane-Type Diterpenoids from *Alternaria brassicicola*. *J. Nat. Prod.* **2020**, *83*, 1931–1938. DOI: 10.1021/acs.jnatprod.0c00165
4. Chen, B.; Yang, Y.; Zhang, X.; Xu, D.; Sun, Y.; Chen, Y.; Wang, L. Total Syntheses of Brassicicenes A, R, and T. *Org. Lett.* **2023**, *25*, 8570–8574. DOI: 10.1021/acs.orglett.3c03355.
5. Uwamori, M.; Osada, R.; Sugiyama, R.; Nagatani, K.; Nakada, M. Enantioselective Total Synthesis of Cotylenin A. *J. Am. Chem. Soc.* **2020**, *142*, 5556–5561. DOI: 10.1021/jacs.0c01774.

## V. NMR Spectra

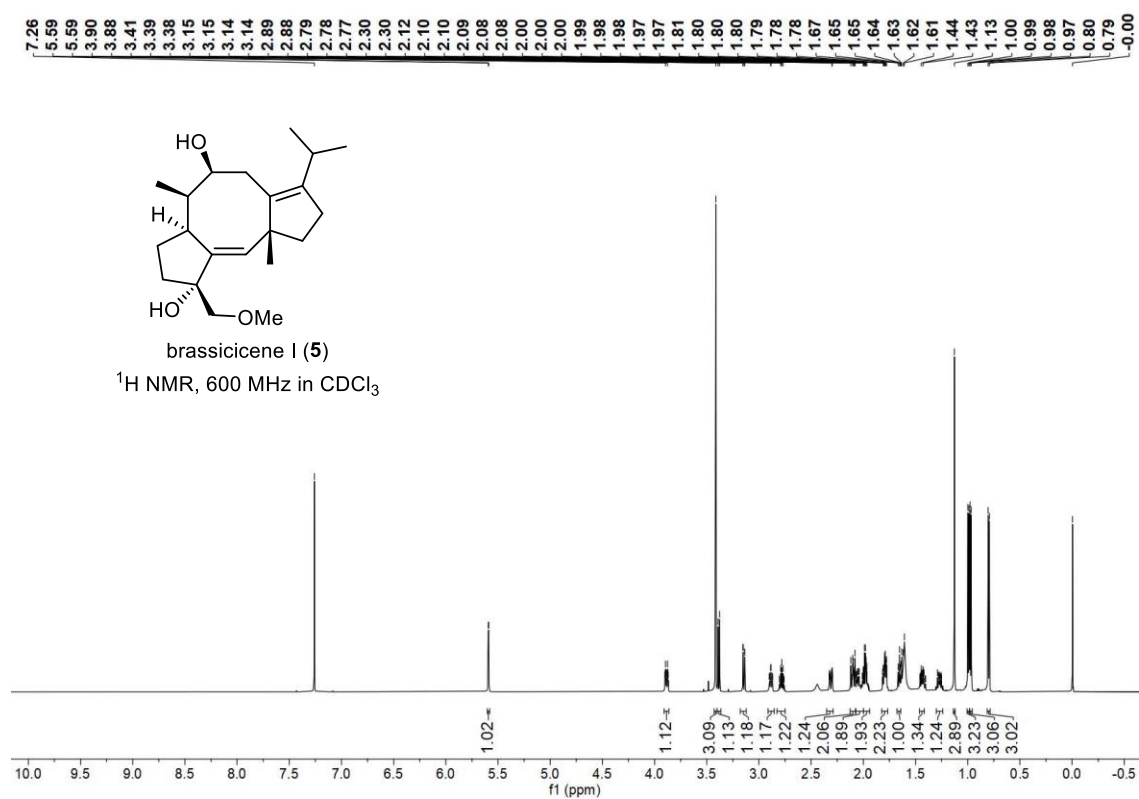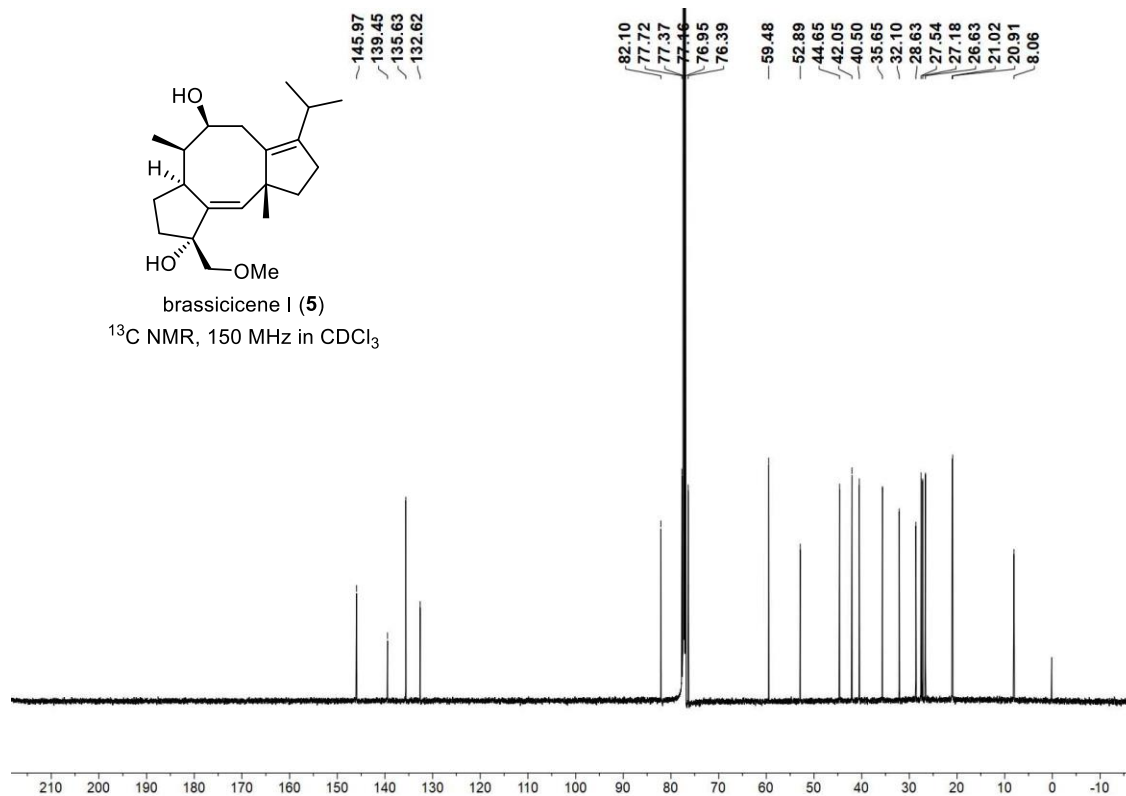

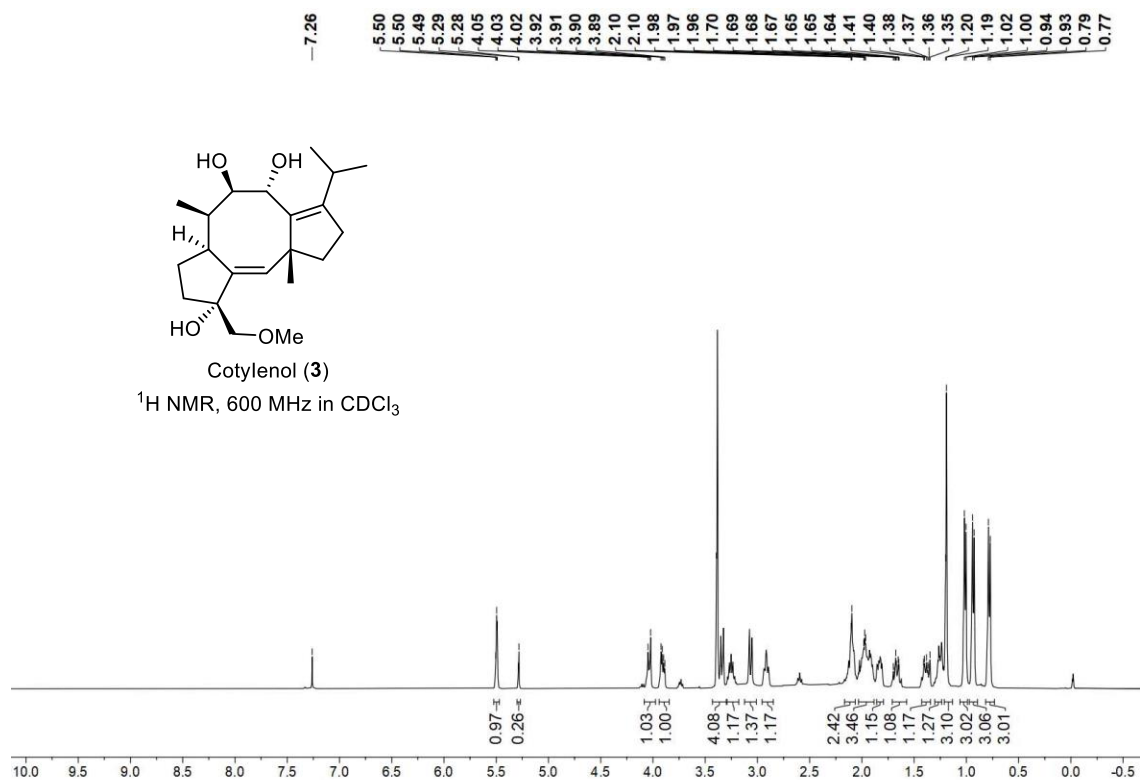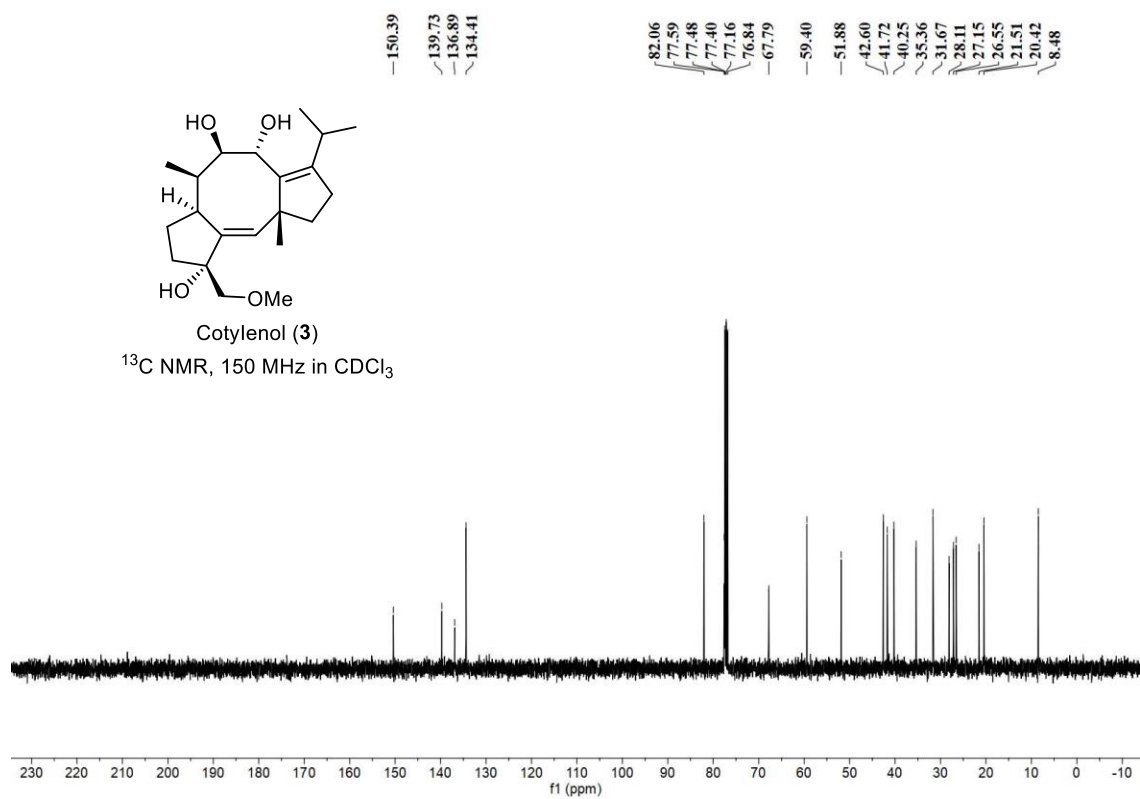



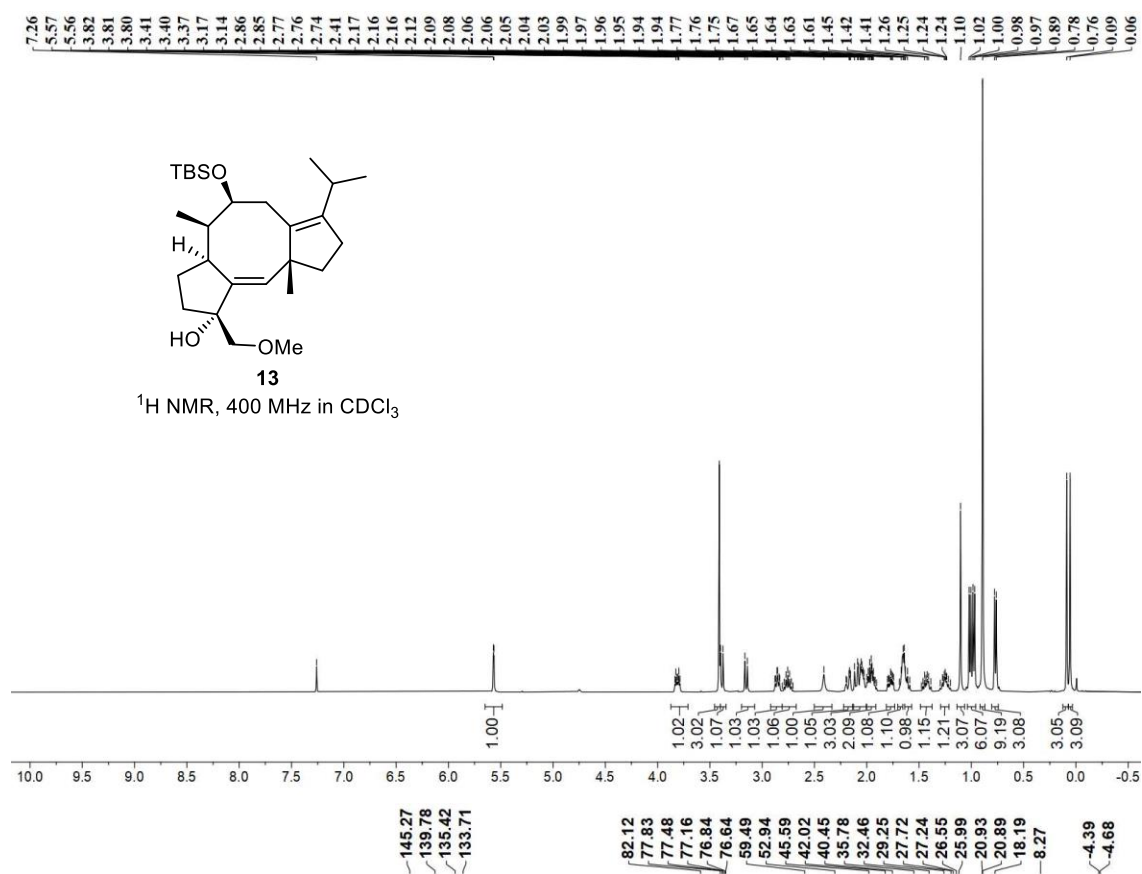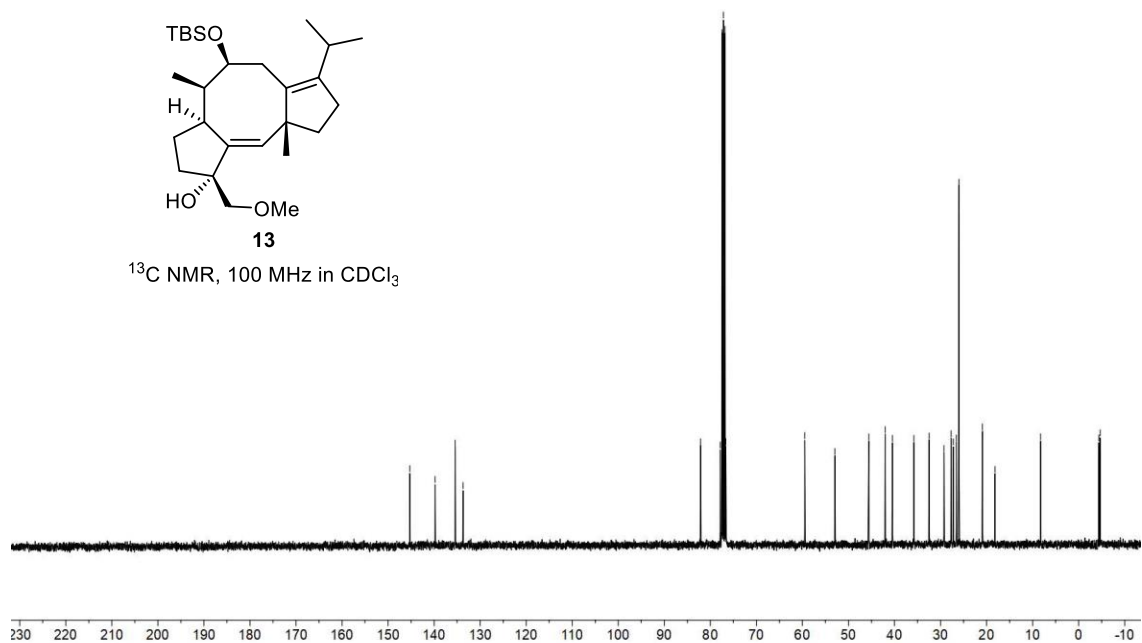

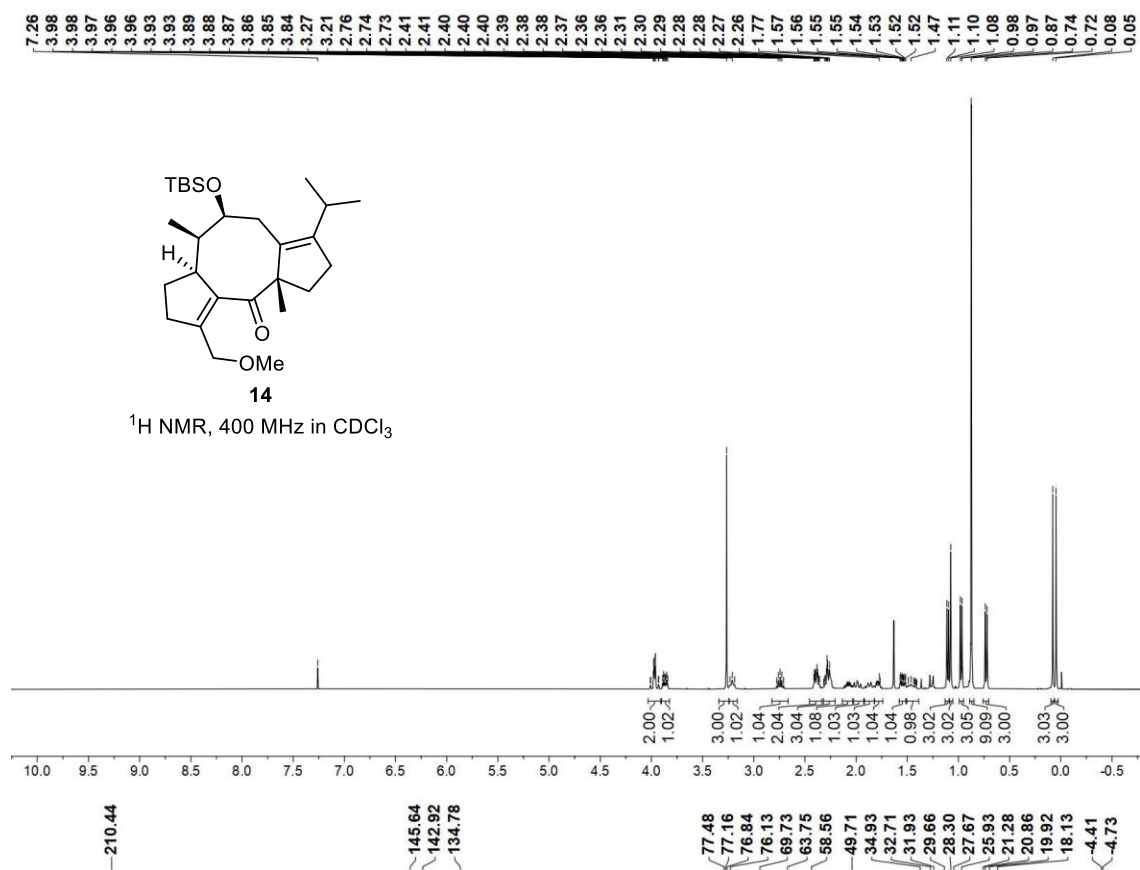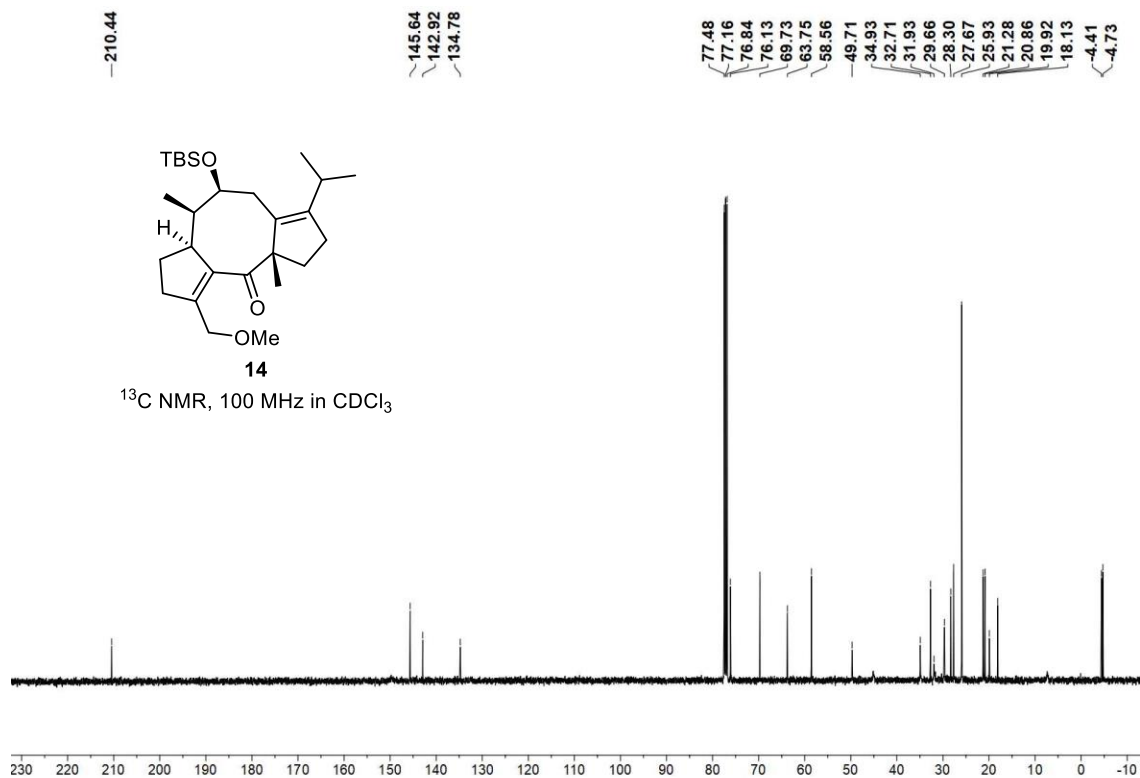

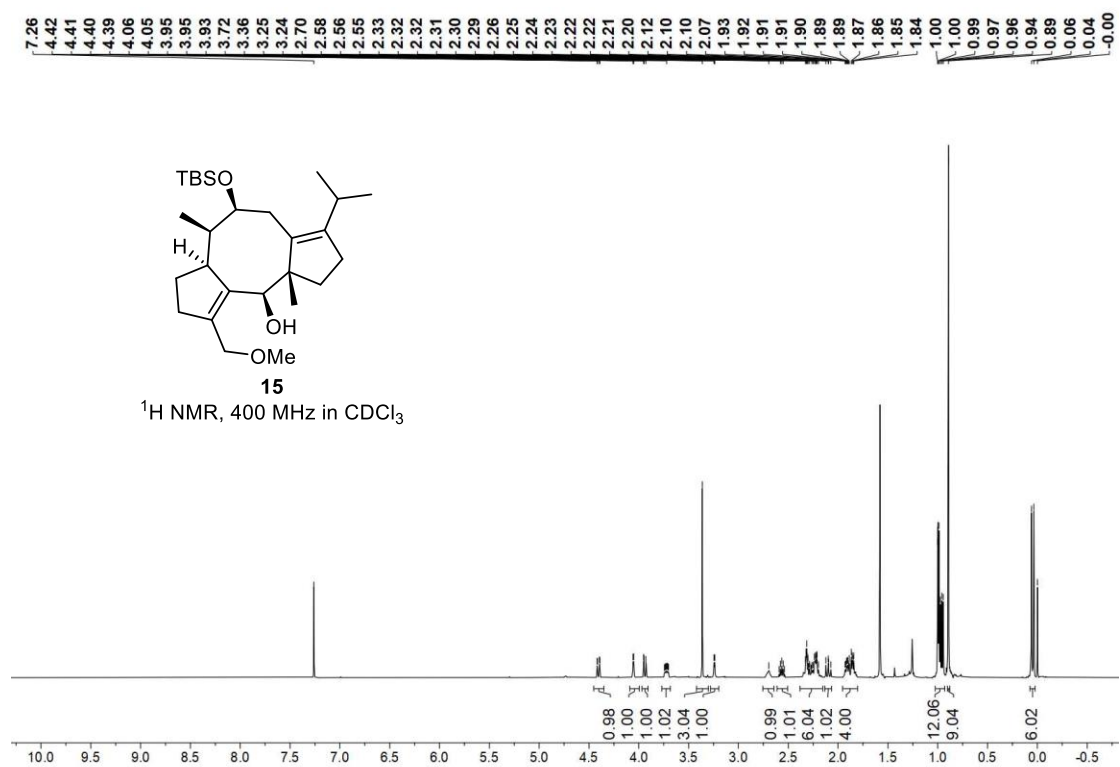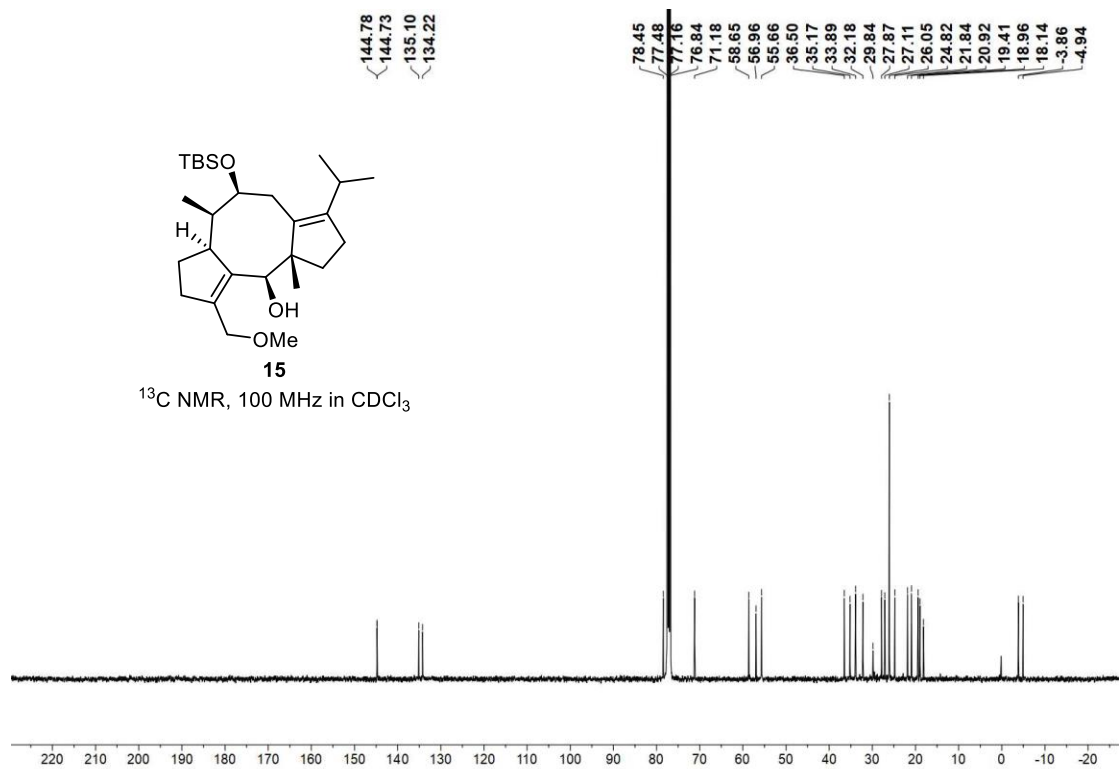

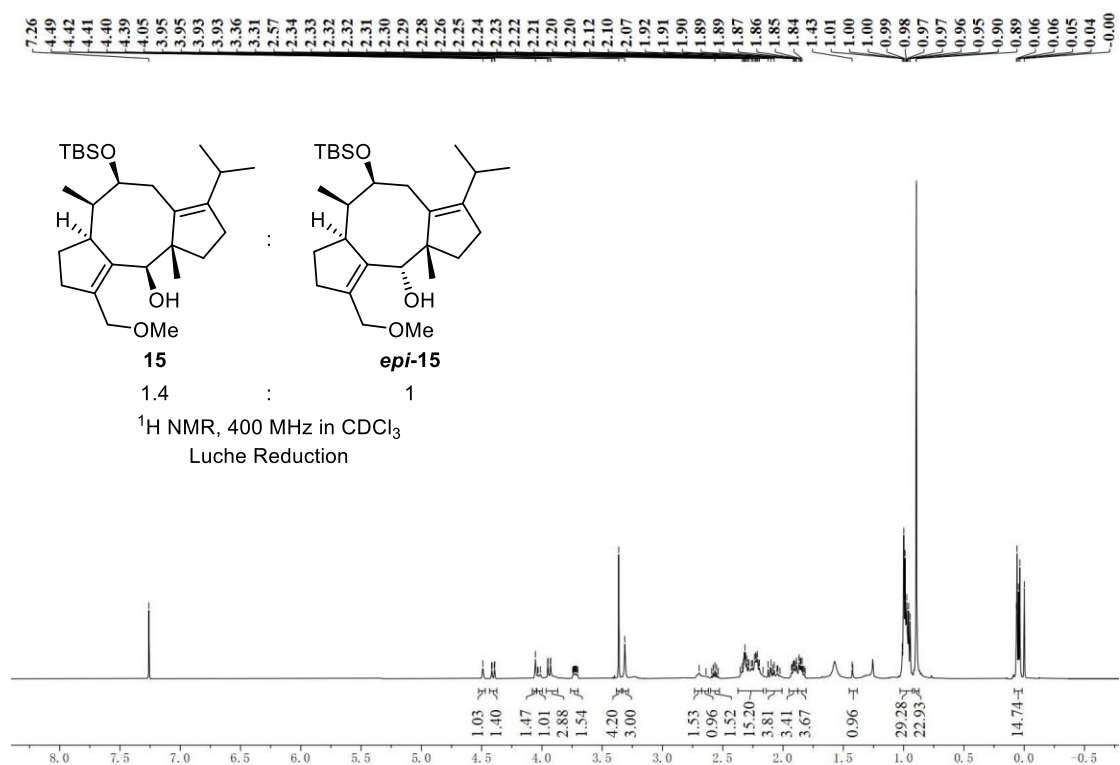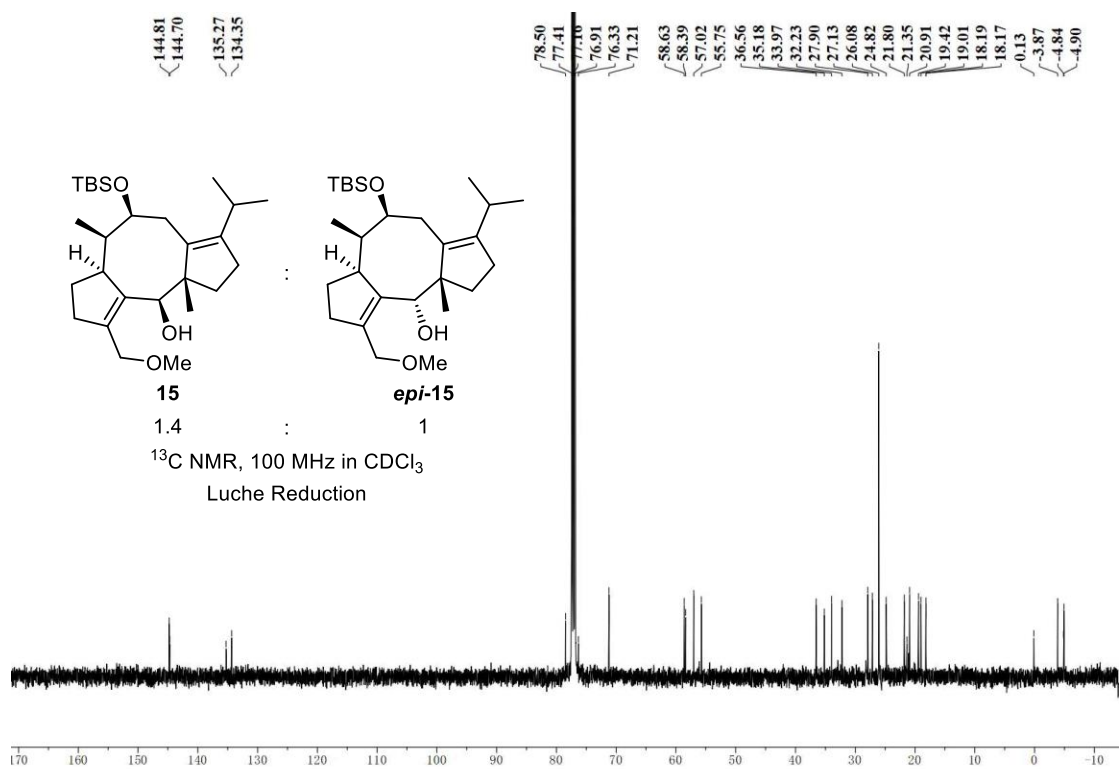

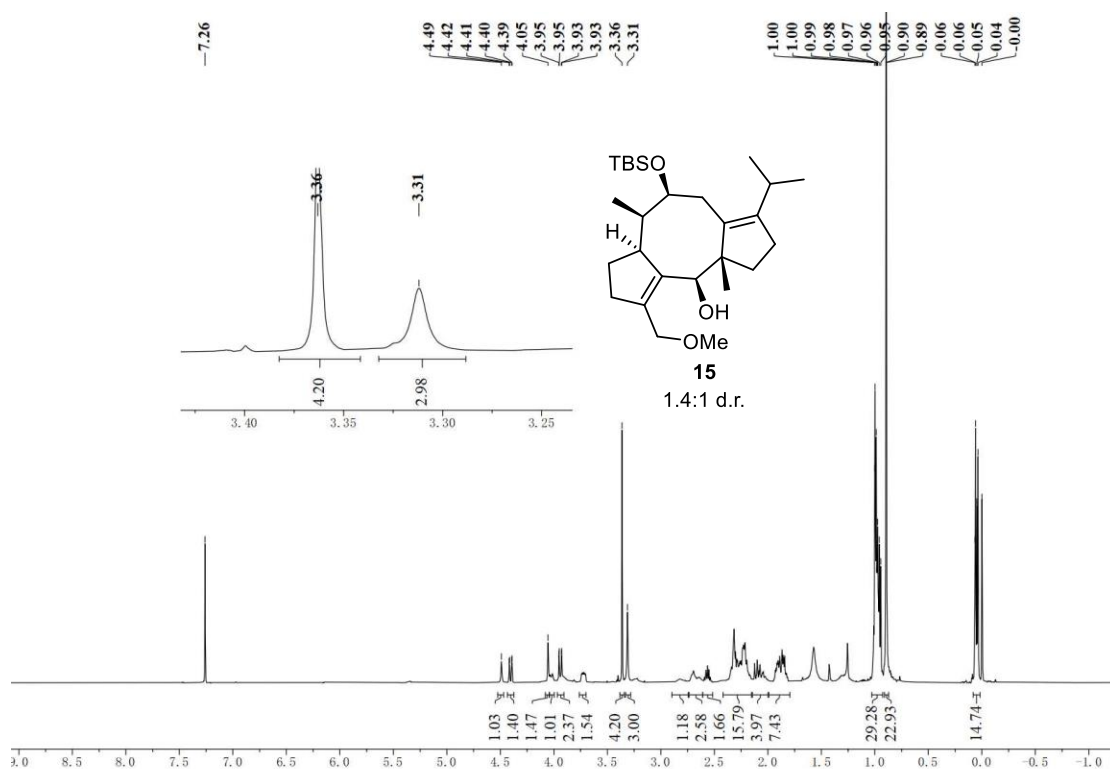

<sup>1</sup>H NMR Spectrum of **15**, 1:1 d.r. (400 MHz, CDCl<sub>3</sub>), by Luche reduction

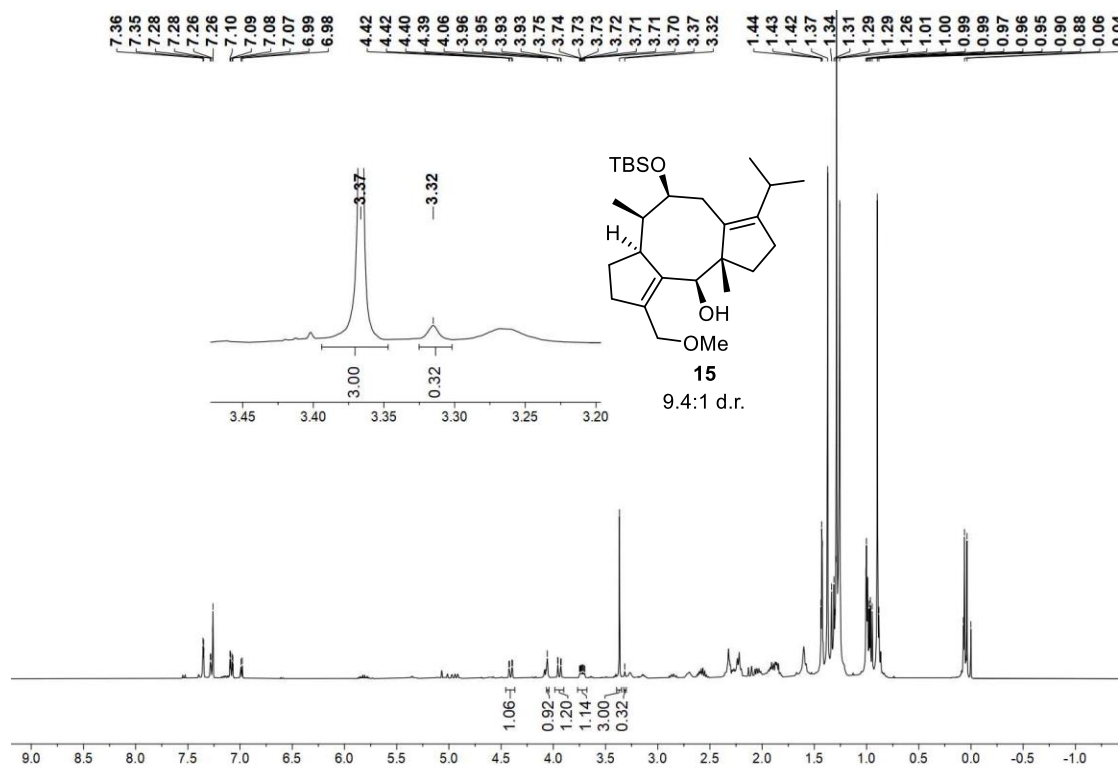

<sup>1</sup>H NMR Spectrum of reaction mixture of **15**, 9:1 d.r. (400 MHz, CDCl<sub>3</sub>), reduced by L-selectride

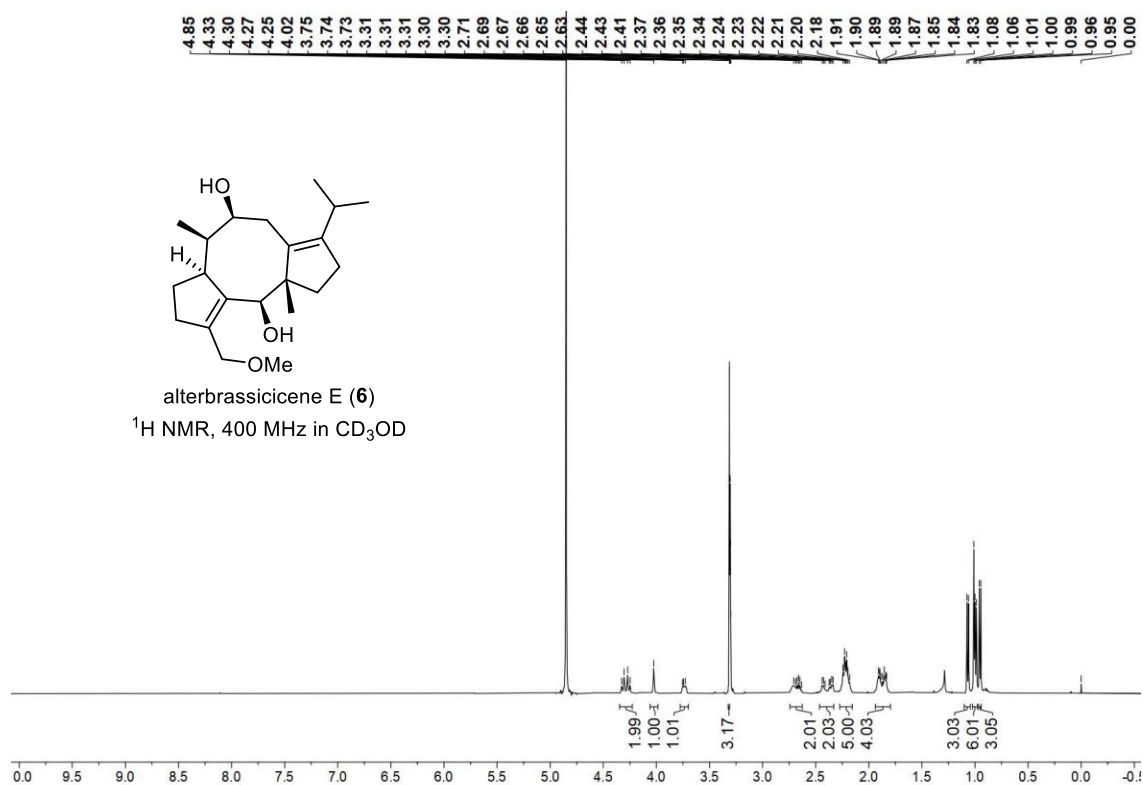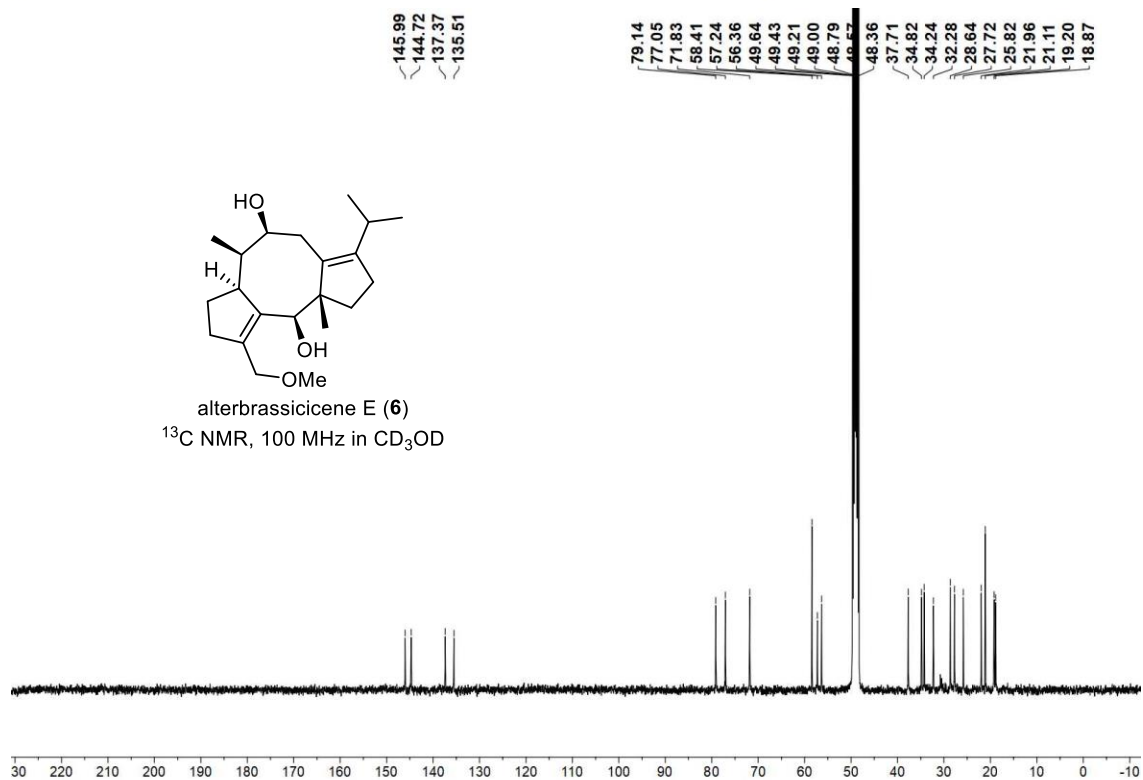

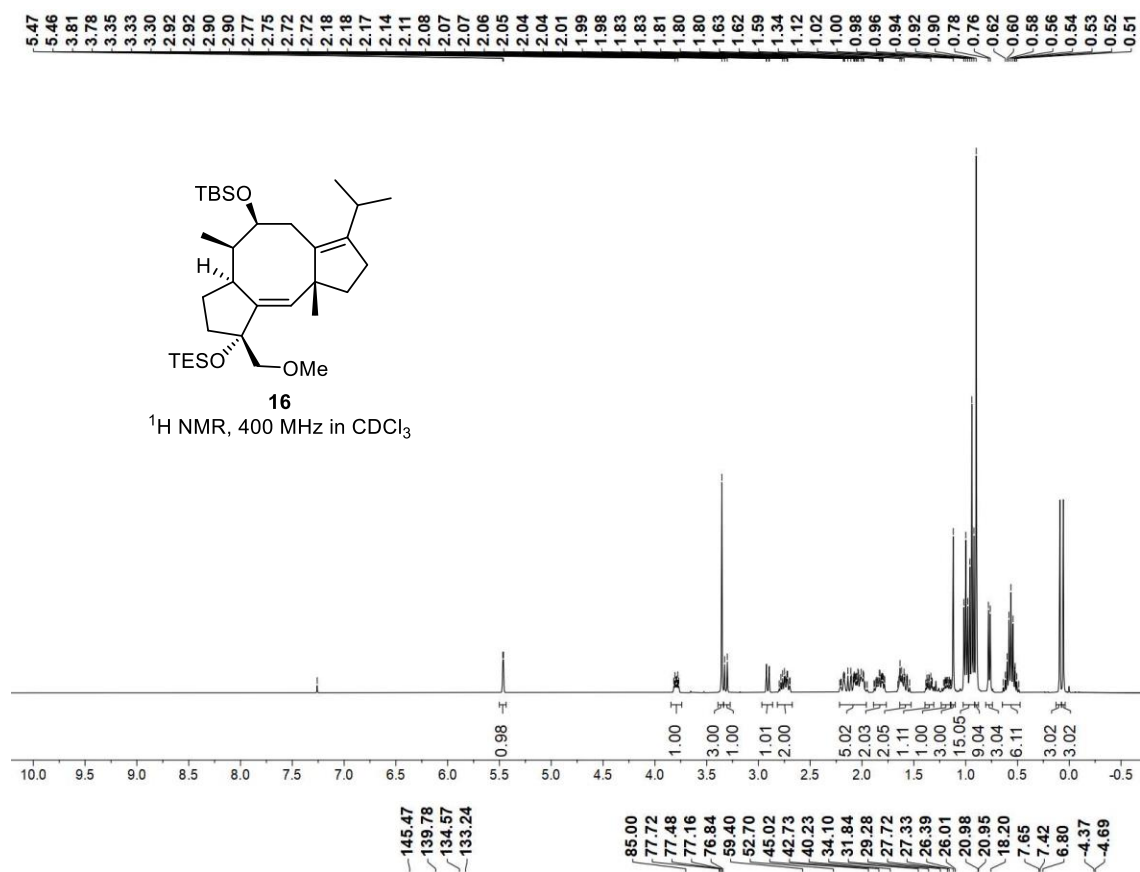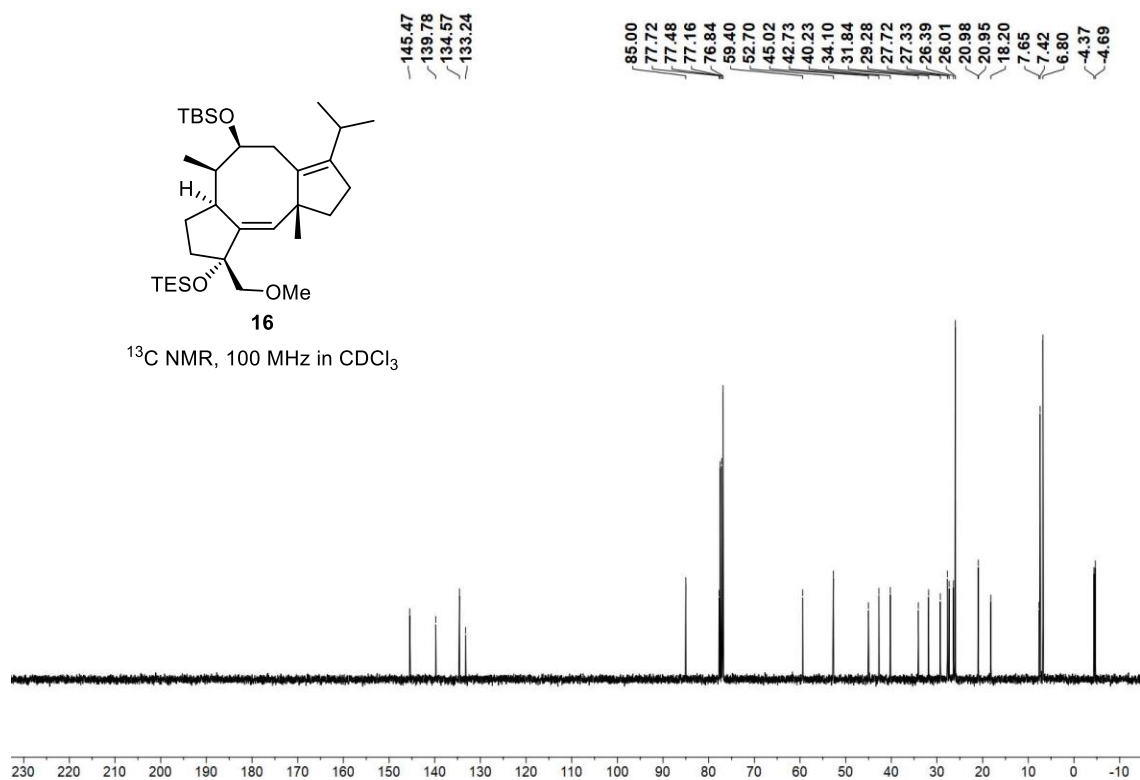

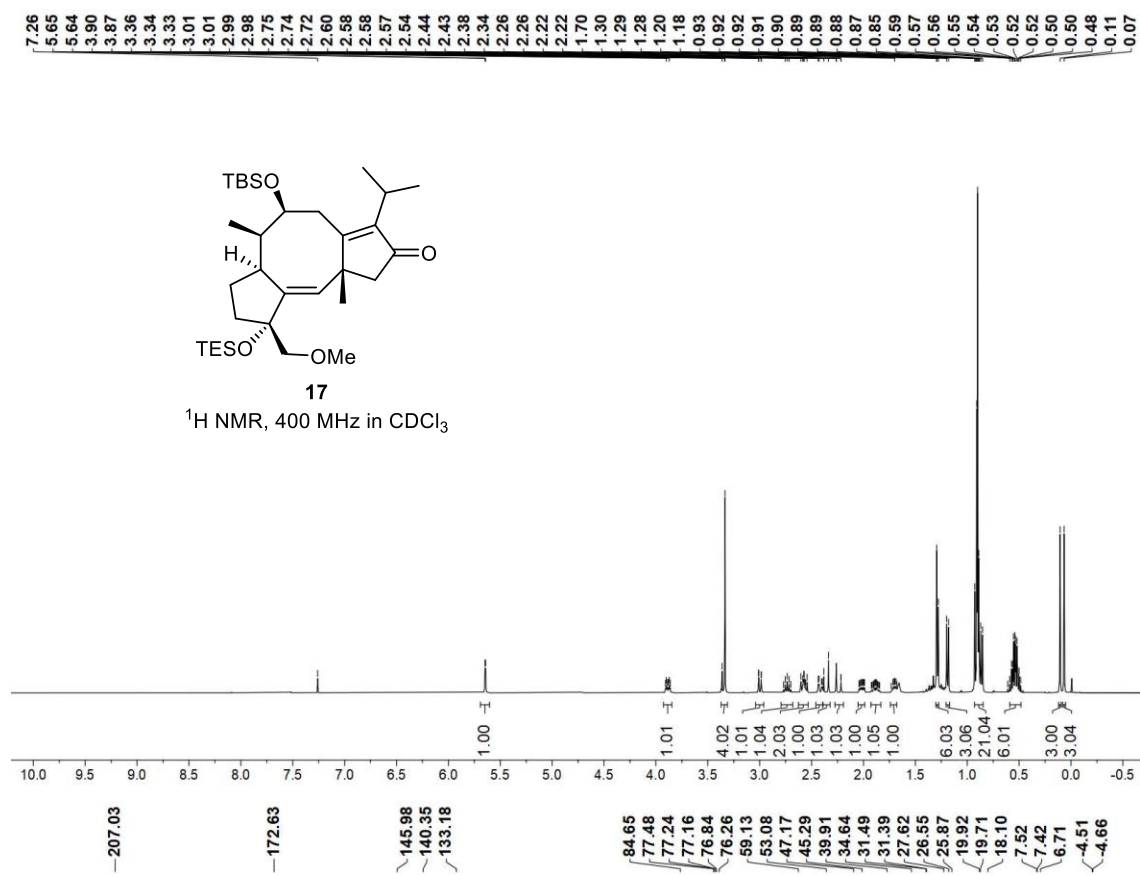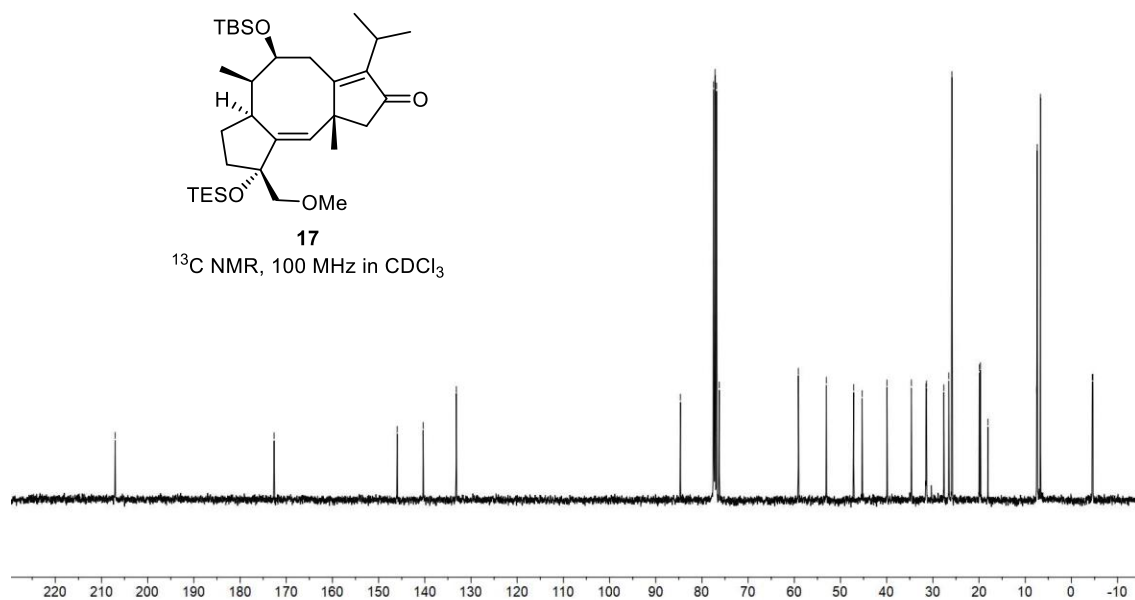



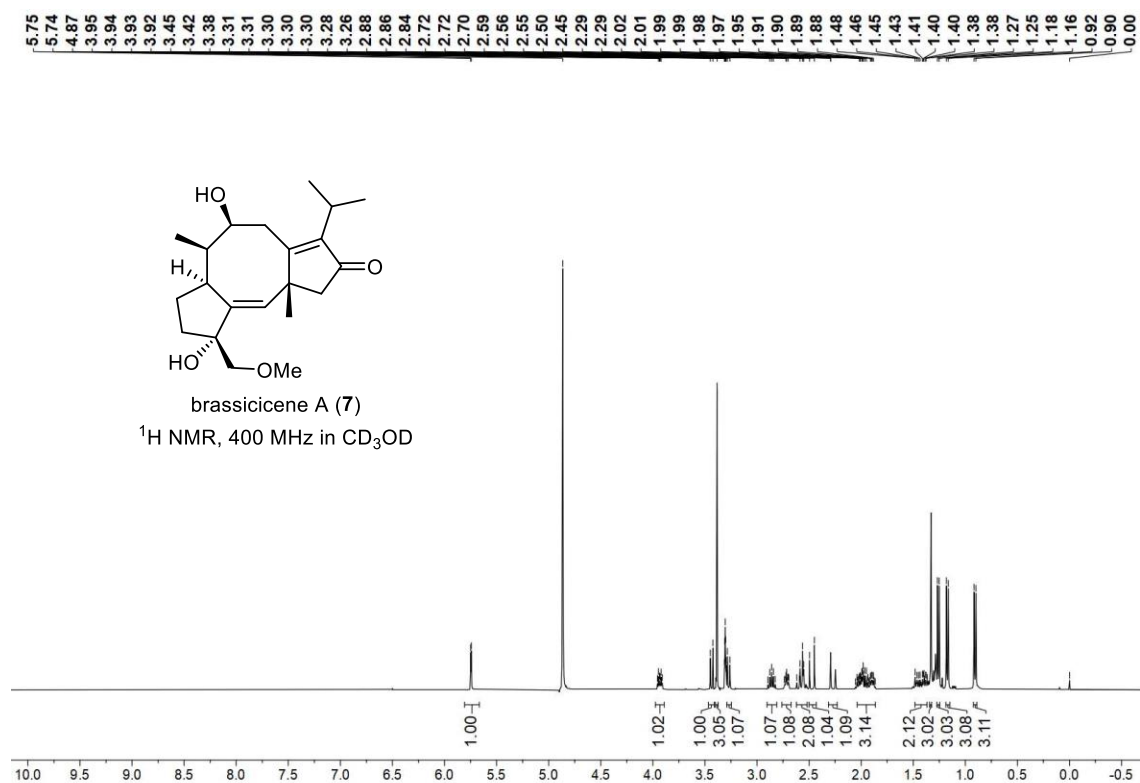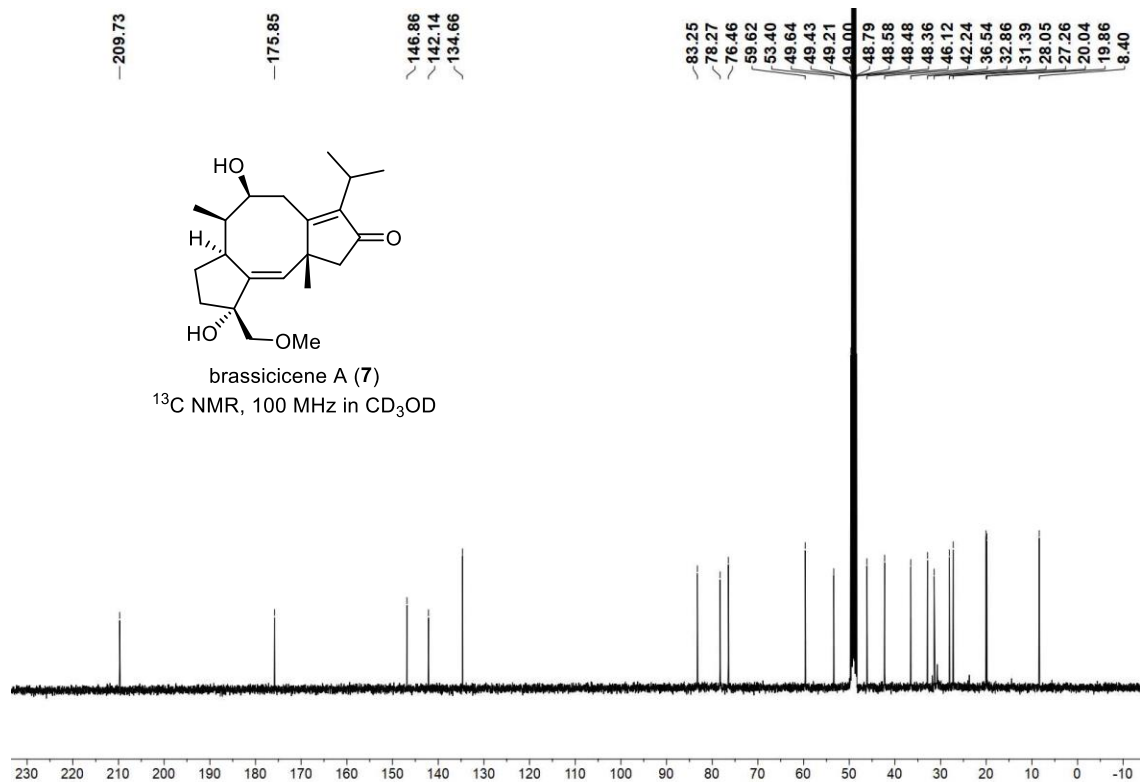

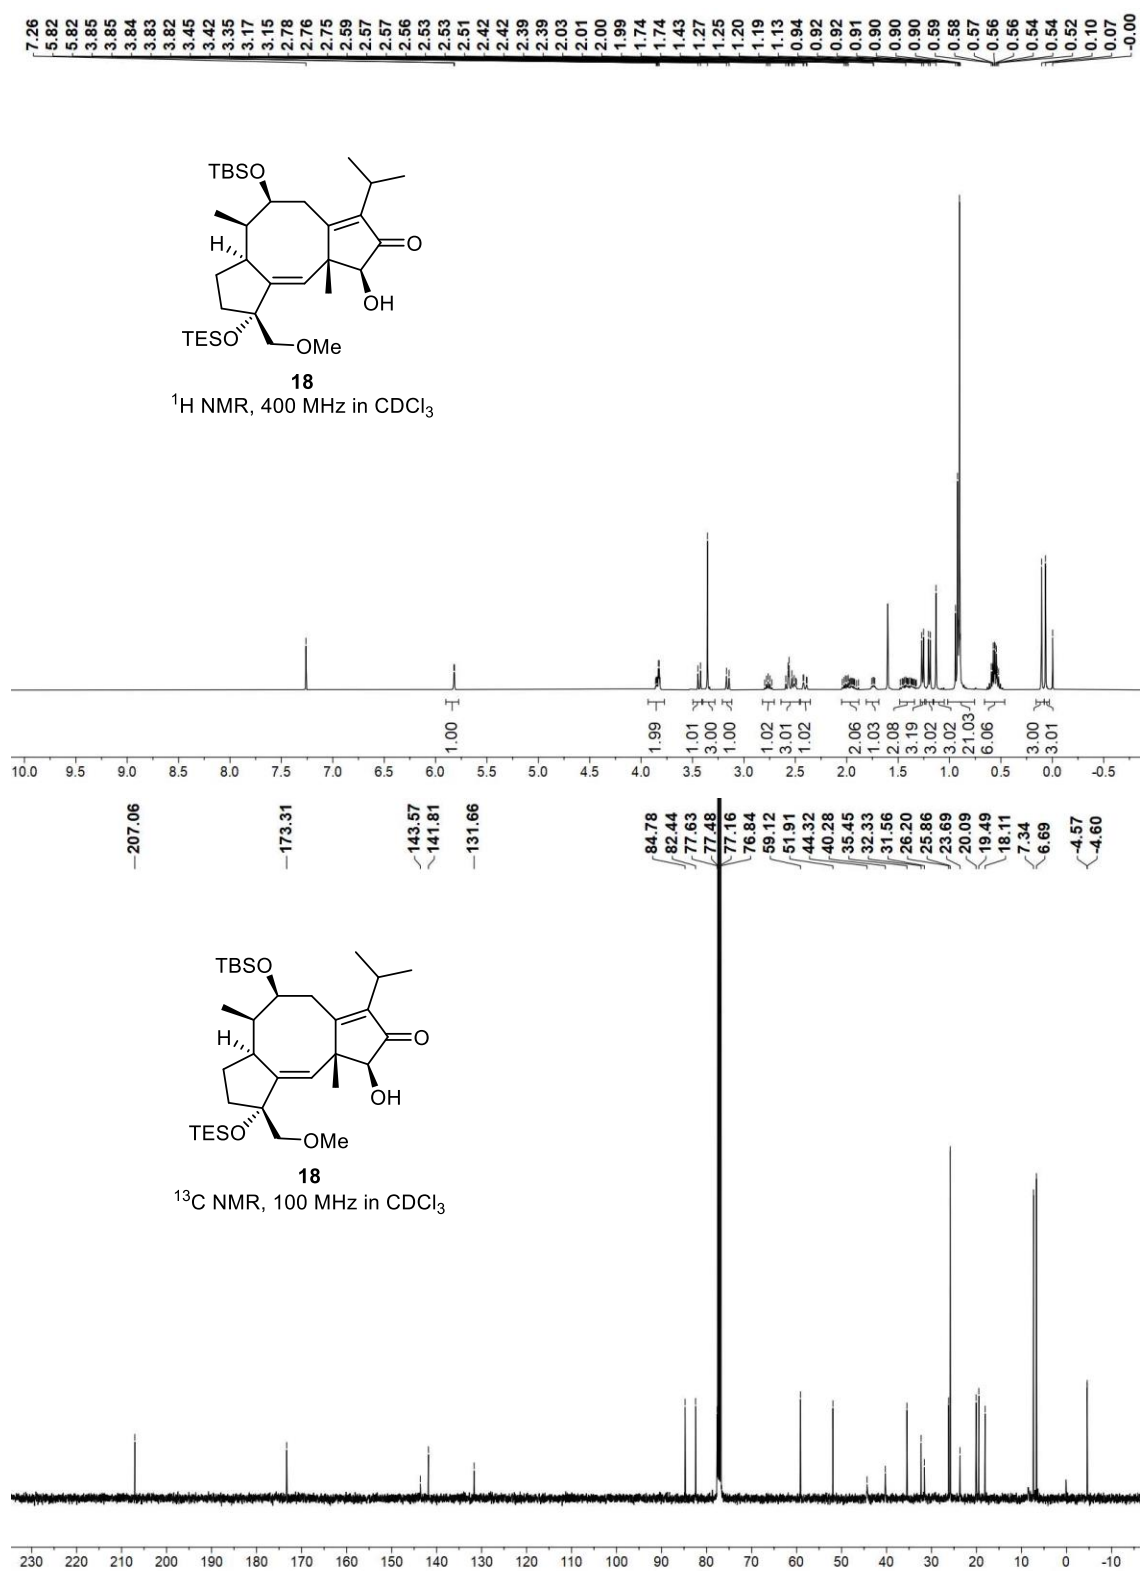

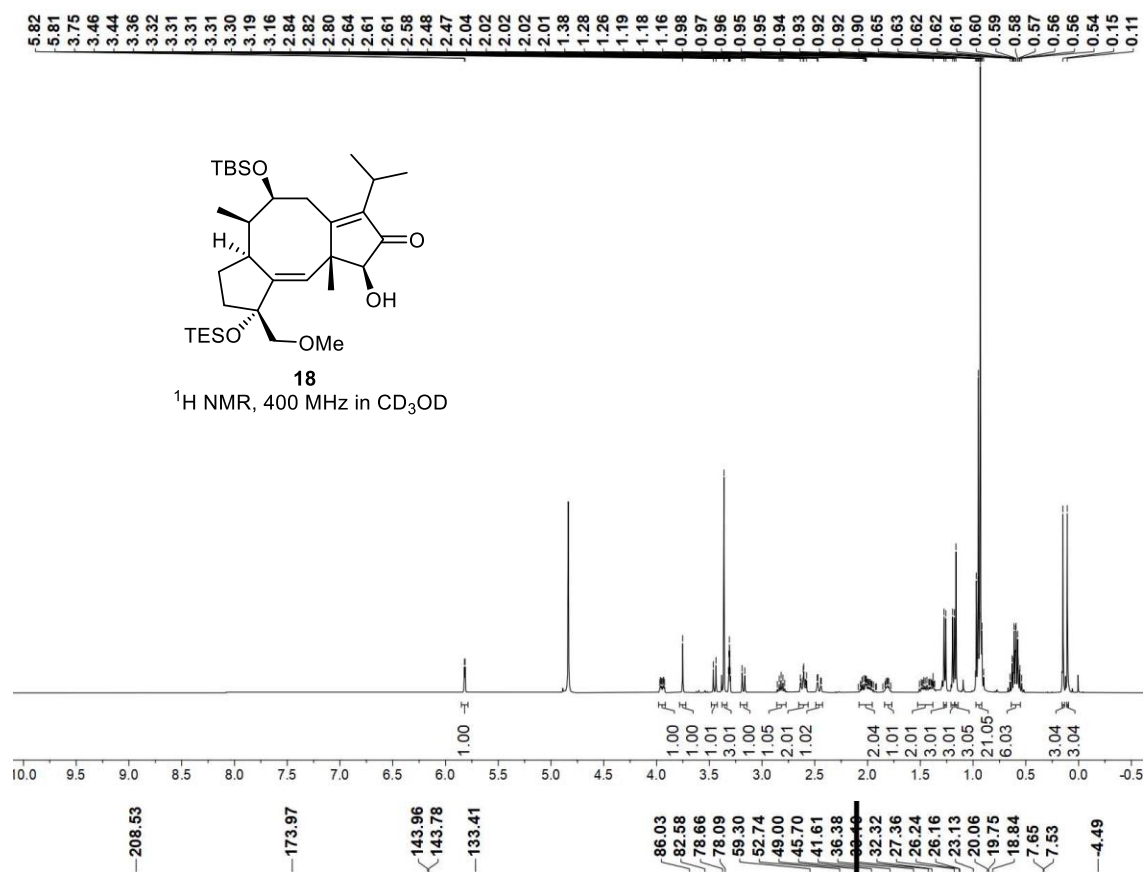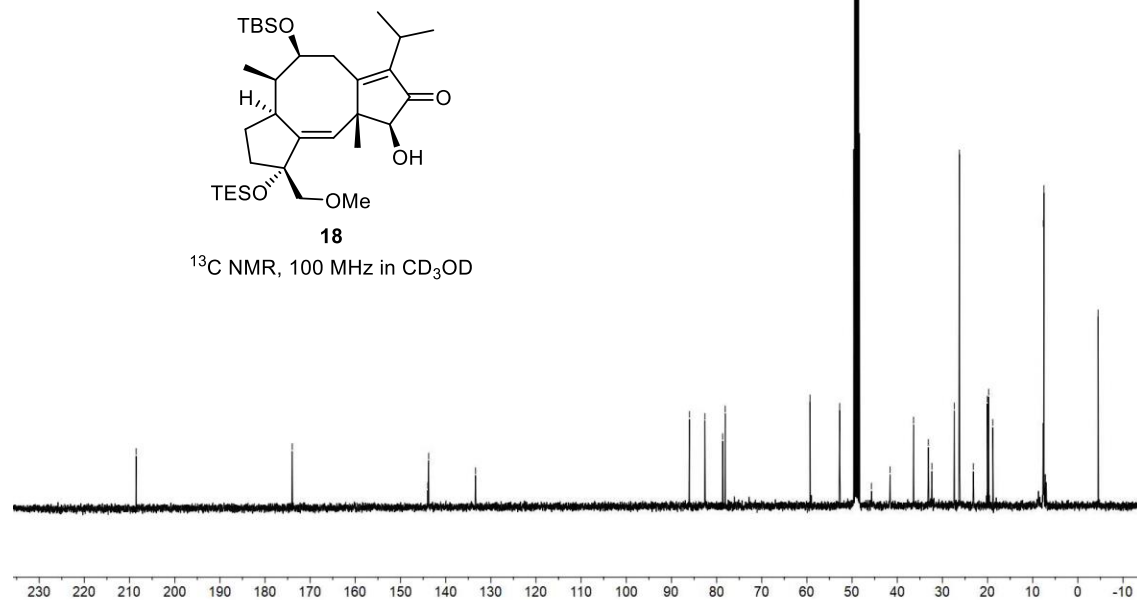

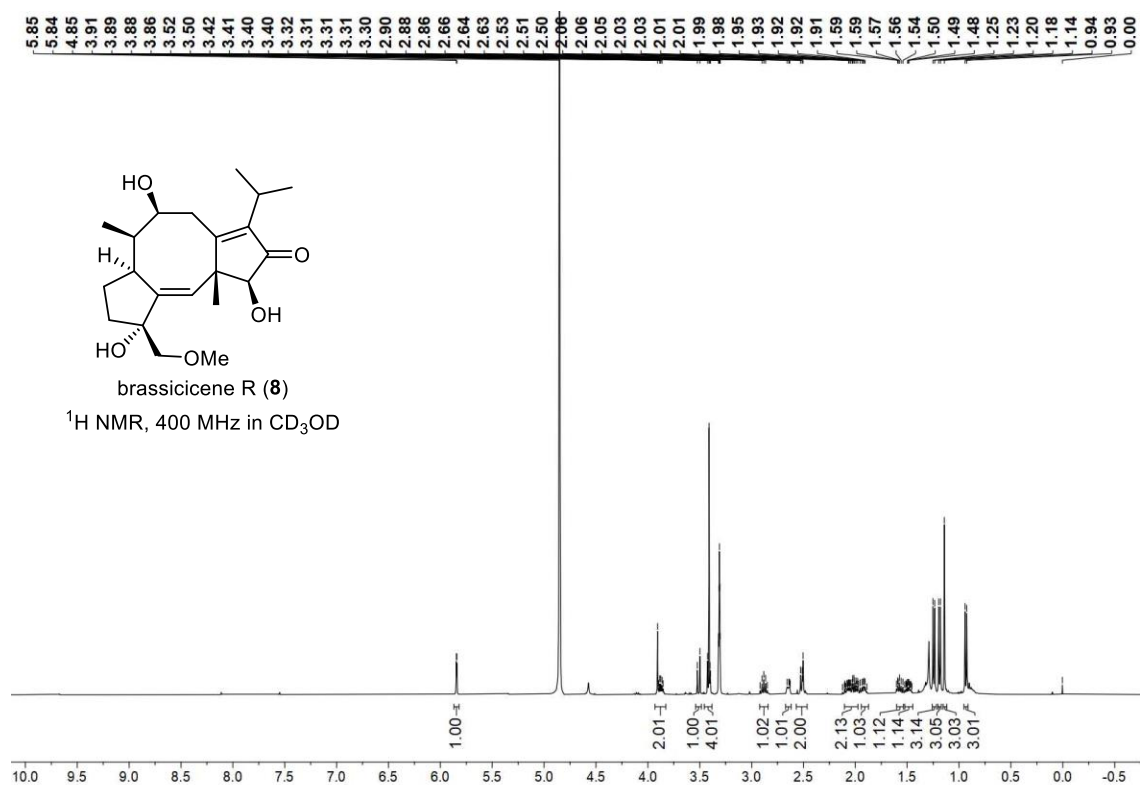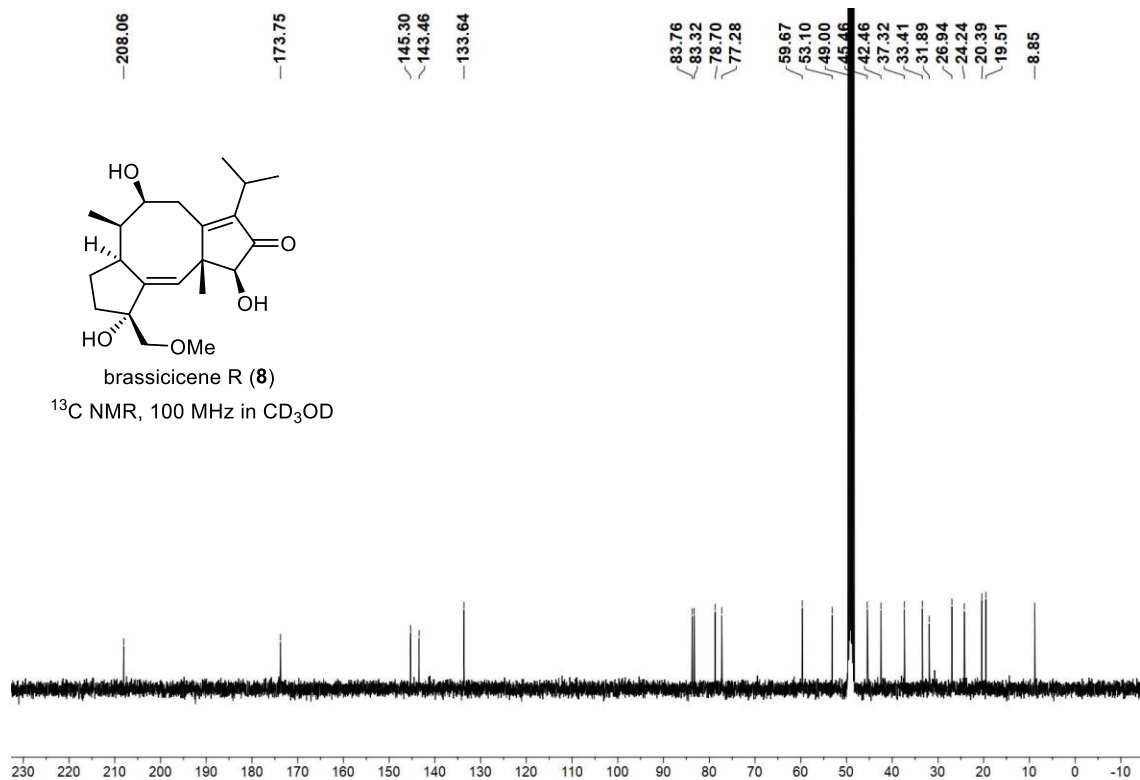

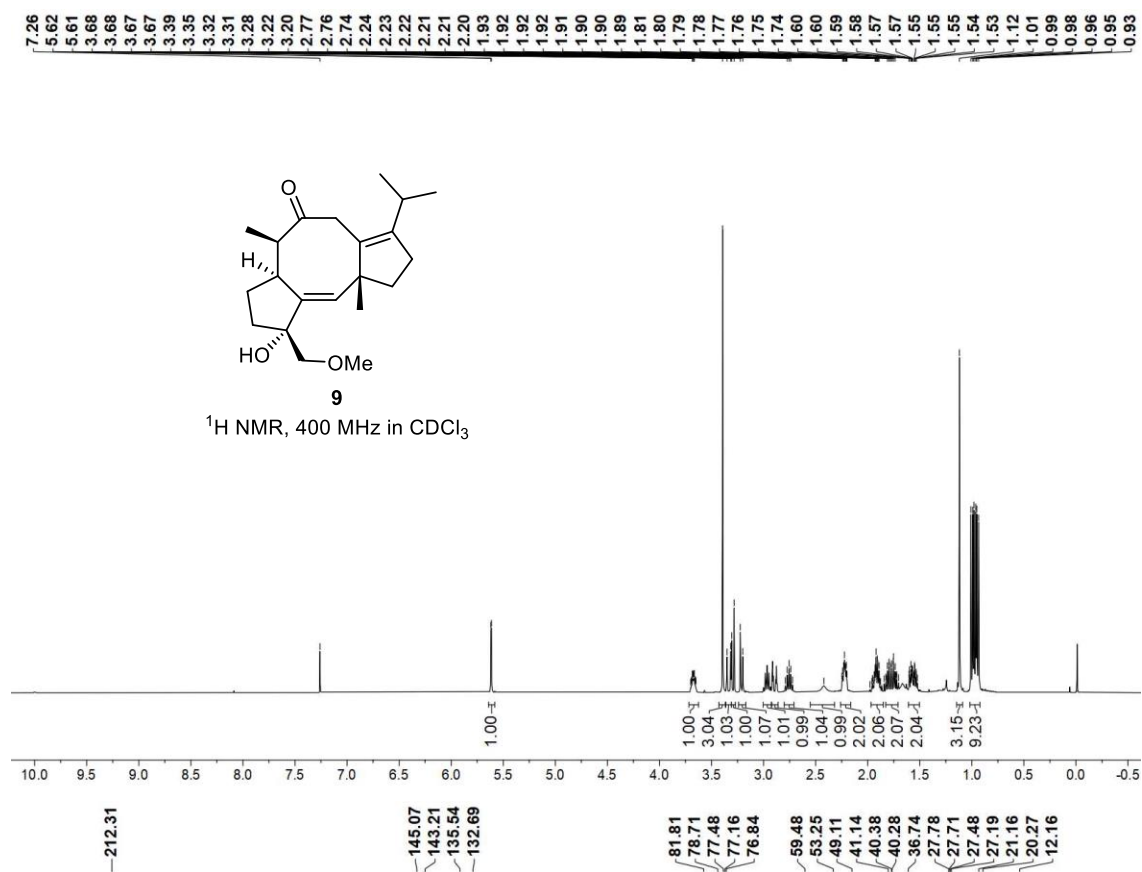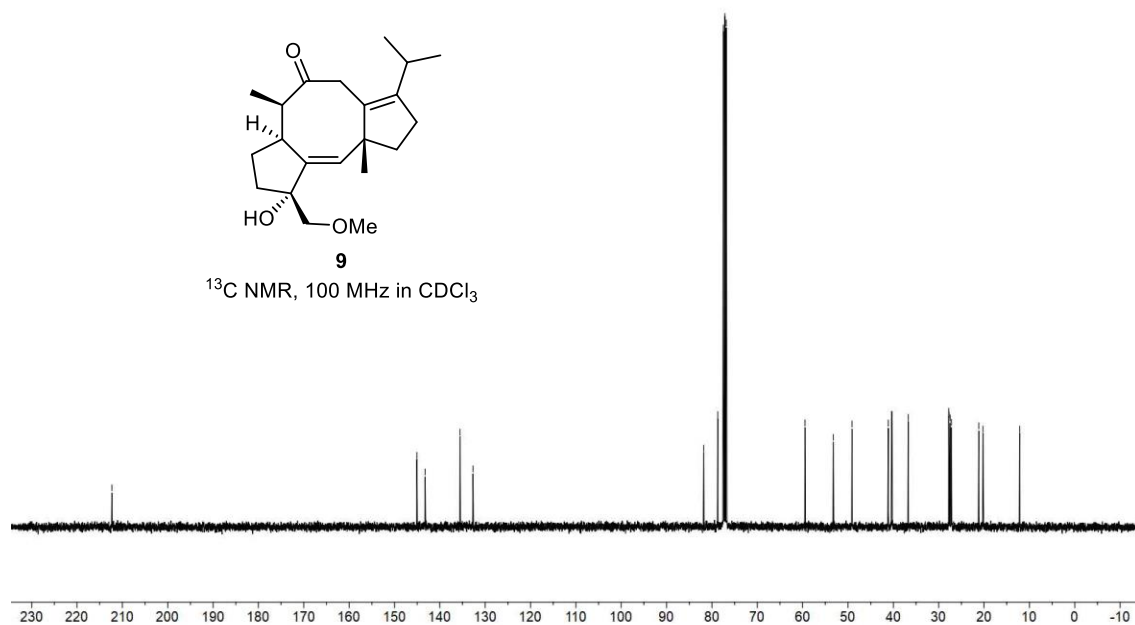

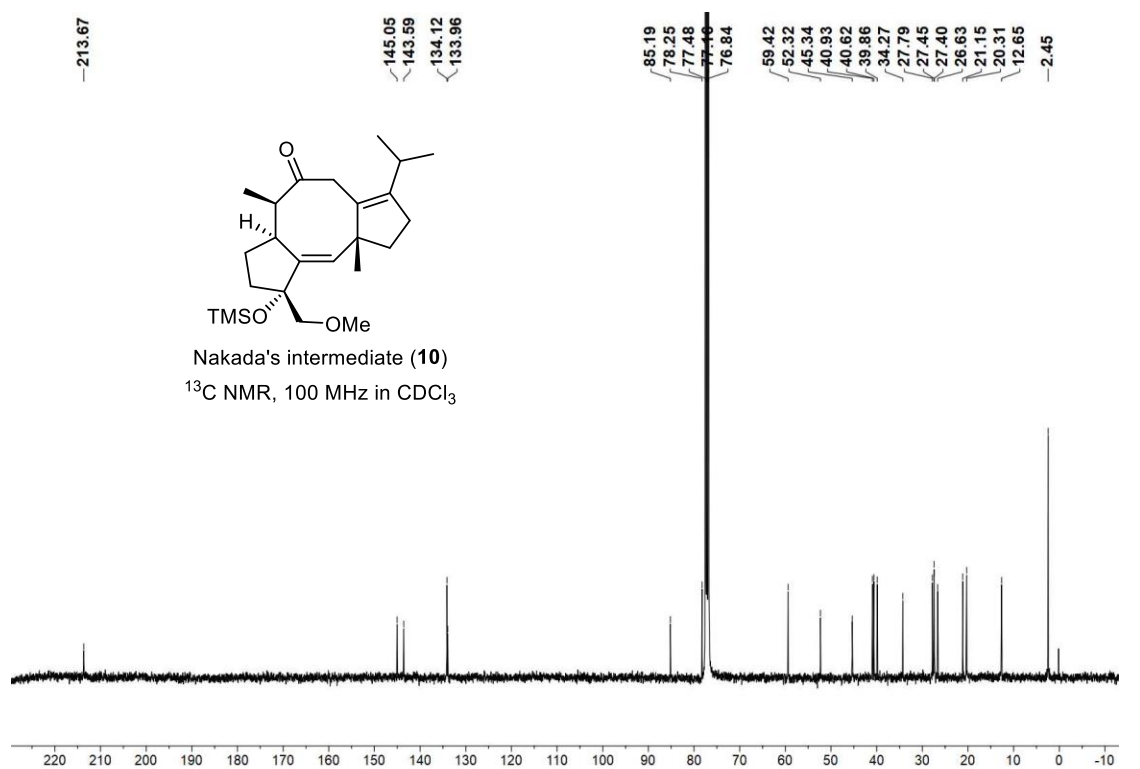

Supplement: Additional file 1 [file 1860-5397-21-111-S1.pdf]
